# Supplementary material for: Noninvasive Analysis Using Data‐Independent Acquisition Mass Spectrometry: New Epidermal Proteins That Reveal Sex Differences in the Aging Process
Source: Hindawi journal article supplement (doi:10.1155/2021/8849328), 2021-01-01
Supplement: f1 [file 8849328.f1.docx]

**Supplementary Tables**

**Supplementary Table 1** List of 57 proteins significantly upregulated in elderly compares with young.

| Accession | ID | Description | Gene | Peptide count | Sequence coverage (%) | pvalue | log2FC |
| --- | --- | --- | --- | --- | --- | --- | --- |
| Q08380 | LG3BP_HUMAN | Galectin-3-binding protein | LGALS3BP | 9 | 21.9 | 0.000807 | 0.699600716 |
| P69905 | HBA_HUMAN | Hemoglobin subunit alpha | HBA1 | 9 | 74.6 | 0.00096 | 3.606117926 |
| O75787 | RENR_HUMAN | Renin receptor | ATP6AP2 | 8 | 26.6 | 0.00129 | 1.013956688 |
| P02652 | APOA2_HUMAN | Apolipoprotein A-II | APOA2 | 4 | 33.0 | 0.001355 | 3.069191305 |
| P10909 | CLUS_HUMAN | Clusterin | CLU | 9 | 20.9 | 0.001427 | 1.667491731 |
| O95969 | SG1D2_HUMAN | Secretoglobin family 1D member 2 | SCGB1D2 | 3 | 22.2 | 0.001598 | 2.661438366 |
| O75326 | SEM7A_HUMAN | Semaphorin-7A | SEMA7A | 7 | 15.6 | 0.002046 | 1.413949174 |
| P61769 | B2MG_HUMAN | Beta-2-microglobulin | B2M | 1 | 8.4 | 0.0021 | 1.589802323 |
| P26447 | S10A4_HUMAN | Protein S100-A4 | S100A4 | 2 | 19.8 | 0.002244 | 0.733525902 |
| P68871 | HBB_HUMAN | Hemoglobin subunit beta | HBB | 14 | 84.4 | 0.002533 | 3.461959549 |
| P02647 | APOA1_HUMAN | Apolipoprotein A-I | APOA1 | 14 | 44.9 | 0.002888 | 2.434376572 |
| P35237 | SPB6_HUMAN | Serpin B6 | SERPINB6 | 14 | 45.2 | 0.002979 | 1.223815533 |
| P00738 | HPT_HUMAN | Haptoglobin | HP | 7 | 21.9 | 0.002984 | 2.894848456 |
| P60953 | CDC42_HUMAN | Cell division control protein 42 homolog | CDC42 | 4 | 26.7 | 0.003204 | 1.083941598 |
| P23280 | CAH6_HUMAN | Carbonic anhydrase 6 | CA6 | 5 | 20.1 | 0.003541 | 1.25297967 |
| Q2TAY7 | SMU1_HUMAN | WD40 repeat-containing protein SMU1 | SMU1 | 5 | 17.9 | 0.004182 | 1.142606162 |
| P02671 | FIBA_HUMAN | Fibrinogen alpha chain | FGA | 12 | 22.7 | 0.004311 | 2.939181317 |
| P01011 | AACT_HUMAN | Alpha-1-antichymotrypsin | SERPINA3 | 7 | 16.8 | 0.004355 | 0.955735505 |
| P07355 | ANXA2_HUMAN | Annexin A2 | ANXA2 | 25 | 73.2 | 0.005062 | 0.596702066 |
| P00918 | CAH2_HUMAN | Carbonic anhydrase 2 | CA2 | 4 | 17.3 | 0.005483 | 1.752290412 |
| P01040 | CYTA_HUMAN | Cystatin-A | CSTA | 11 | 72.4 | 0.006286 | 0.780435706 |
| A1L3X0 | ELOV7_HUMAN | Elongation of very long chain fatty acids protein 7 | ELOVL7 | 1 | 3.6 | 0.006917 | 1.343247065 |
| P01034 | CYTC_HUMAN | Cystatin-C | CST3 | 1 | 7.5 | 0.007101 | 0.889057366 |
| Q15631 | TSN_HUMAN | Translin | TSN | 2 | 9.6 | 0.009122 | 2.015523507 |
| Q9UL25 | RAB21_HUMAN | Ras-related protein Rab-21 | RAB21 | 1 | 7.6 | 0.009851 | 0.834517169 |
| Q9ULI1 | NWD2_HUMAN | NACHT and WD repeat domain-containing protein 2 | NWD2 | 2 | 1.4 | 0.010662 | 0.607138134 |
| P08582 | TRFM_HUMAN | Melanotransferrin | MELTF | 14 | 27.4 | 0.01071 | 1.749460154 |
| P16870 | CBPE_HUMAN | Carboxypeptidase E | CPE | 13 | 36.3 | 0.01083 | 1.293567009 |
| P81605 | DCD_HUMAN | Dermcidin | DCD | 7 | 47.3 | 0.012168 | 1.798852287 |
| P12273 | PIP_HUMAN | Prolactin-inducible protein | PIP | 10 | 62.3 | 0.013534 | 1.948848778 |
| P30740 | ILEU_HUMAN | Leukocyte elastase inhibitor | SERPINB1 | 11 | 34.3 | 0.013816 | 1.059854513 |
| Q9HB07 | MYG1_HUMAN | UPF0160 protein MYG1, mitochondrial | C12orf10 | 4 | 12.8 | 0.013933 | 1.541602235 |
| Q14118 | DAG1_HUMAN | Dystroglycan | DAG1 | 4 | 7.0 | 0.014746 | 1.022262057 |
| Q9NQR4 | NIT2_HUMAN | Omega-amidase NIT2 | NIT2 | 3 | 17.0 | 0.015016 | 1.39717603 |
| P35052 | GPC1_HUMAN | Glypican-1 | GPC1 | 1 | 2.5 | 0.015251 | 1.777497074 |
| P55072 | TERA_HUMAN | Transitional endoplasmic reticulum ATPase | VCP | 13 | 22.8 | 0.01621 | 1.80077023 |
| O15296 | LX15B_HUMAN | Arachidonate 15-lipoxygenase B | ALOX15B | 4 | 8.6 | 0.016722 | 1.744041702 |
| P07195 | LDHB_HUMAN | L-lactate dehydrogenase B chain | LDHB | 9 | 32.0 | 0.01678 | 1.592001614 |
| P02545 | LMNA_HUMAN | Prelamin-A/C | LMNA | 12 | 22.1 | 0.017547 | 1.517490691 |
| O43278 | SPIT1_HUMAN | Kunitz-type protease inhibitor 1 | SPINT1 | 5 | 9.3 | 0.018128 | 1.341724781 |
| P02763 | A1AG1_HUMAN | Alpha-1-acid glycoprotein 1 | ORM1 | 3 | 21.9 | 0.020624 | 1.647677169 |
| P06737 | PYGL_HUMAN | Glycogen phosphorylase, liver form | PYGL | 10 | 15.9 | 0.020716 | 0.70455771 |
| P02774 | VTDB_HUMAN | Vitamin D-binding protein | GC | 3 | 5.1 | 0.023154 | 2.342869777 |
| Q9H190 | SDCB2_HUMAN | Syntenin-2 | SDCBP2 | 2 | 7.5 | 0.026649 | 0.80711232 |
| Q3MJ16 | PA24E_HUMAN | Cytosolic phospholipase A2 epsilon | PLA2G4E | 4 | 4.8 | 0.028501 | 0.840172983 |
| P00450 | CERU_HUMAN | Ceruloplasmin | CP | 3 | 4.2 | 0.029955 | 0.610336528 |
| P01023 | A2MG_HUMAN | Alpha-2-macroglobulin | A2M | 8 | 6.9 | 0.031029 | 2.296257375 |
| Q9BYE2 | TMPSD_HUMAN | Transmembrane protease serine 13 | TMPRSS13 | 4 | 7.2 | 0.031752 | 0.979324354 |
| P0C869 | PA24B_HUMAN | Cytosolic phospholipase A2 beta | PLA2G4B | 4 | 6.7 | 0.034032 | 1.197105472 |
| P0DOX6 | IGM_HUMAN | Immunoglobulin mu heavy chain | N/A | 6 | 10.4 | 0.03629 | 2.455662049 |
| P01008 | ANT3_HUMAN | Antithrombin-III | SERPINC1 | 7 | 19.4 | 0.036303 | 1.258363671 |
| P02679 | FIBG_HUMAN | Fibrinogen gamma chain | FGG | 11 | 32.9 | 0.040763 | 1.885175469 |
| P06732 | KCRM_HUMAN | Creatine kinase M-type | CKM | 3 | 13.6 | 0.041678 | 3.761890882 |
| P50990 | TCPQ_HUMAN | T-complex protein 1 subunit theta | CCT8 | 6 | 13.1 | 0.04342 | 1.168851766 |
| P43304 | GPDM_HUMAN | Glycerol-3-phosphate dehydrogenase, mitochondrial | GPD2 | 4 | 6.7 | 0.04563 | 2.262916734 |
| Q96DR8 | MUCL1_HUMAN | Mucin-like protein 1 | MUCL1 | 2 | 18.9 | 0.048572 | 2.007645991 |
| P02675 | FIBB_HUMAN | Fibrinogen beta chain | FGB | 13 | 36.7 | 0.048723 | 1.417893506 |

**Supplementary Table 2** List of 38 proteins significantly downregulated in elderly compares with young.

| Accession | ID | Description | Gene | Peptide count | Sequence coverage (%) | pvalue | log2FC |
| --- | --- | --- | --- | --- | --- | --- | --- |
| Q15018 | ABRX2_HUMAN | BRISC complex subunit Abraxas 2 | ABRAXAS2 | 3 | 9.2 | 0.001216 | -0.75047 |
| Q8IV08 | PLD3_HUMAN | Phospholipase D3 | PLD3 | 10 | 25.7 | 0.002968 | -0.69826 |
| Q9UEU0 | VTI1B_HUMAN | Vesicle transport through interaction with t-SNAREs homolog 1B | VTI1B | 1 | 5.2 | 0.003656 | -0.58699 |
| Q99536 | VAT1_HUMAN | Synaptic vesicle membrane protein VAT-1 homolog | VAT1 | 12 | 47.6 | 0.003974 | -0.78299 |
| Q92764 | KRT35_HUMAN | Keratin, type I cuticular Ha5 | KRT35 | - | - | 0.004355 | -1.64517 |
| O75531 | BAF_HUMAN | Barrier-to-autointegration factor | BANF1 | 2 | 40.4 | 0.004715 | -2.49195 |
| Q16610 | ECM1_HUMAN | Extracellular matrix protein 1 | ECM1 | 19 | 40.4 | 0.008725 | -0.63148 |
| P19012 | K1C15_HUMAN | Keratin, type I cytoskeletal 15 | KRT15 | - | - | 0.00985 | -0.60042 |
| P35579 | MYH9_HUMAN | Myosin-9 | MYH9 | 24 | 16.3 | 0.011356 | -0.90711 |
| Q99436 | PSB7_HUMAN | Proteasome subunit beta type-7 | PSMB7 | 3 | 11.6 | 0.012038 | -0.67833 |
| O95831 | AIFM1_HUMAN | Apoptosis-inducing factor 1, mitochondrial | AIFM1 | 2 | 4.4 | 0.012233 | -0.68137 |
| P46736 | BRCC3_HUMAN | Lys-63-specific deubiquitinase BRCC36 | BRCC3 | 6 | 19.3 | 0.013101 | -1.02376 |
| Q9HC35 | EMAL4_HUMAN | Echinoderm microtubule-associated protein-like 4 | EML4 | 3 | 1.7 | 0.01354 | -1.40796 |
| O00161 | SNP23_HUMAN | Synaptosomal-associated protein 23 | SNAP23 | 4 | 25.1 | 0.015119 | -0.63447 |
| Q6ZNF0 | ACP7_HUMAN | Acid phosphatase type 7 | ACP7 | 8 | 28.3 | 0.01572 | -0.68033 |
| P33764 | S10A3_HUMAN | Protein S100-A3 | S100A3 | 3 | 38.6 | 0.015792 | -1.61227 |
| Q9UL18 | AGO1_HUMAN | Protein argonaute-1 | AGO1 | 14 | 22.1 | 0.01655 | -0.92781 |
| P61604 | CH10_HUMAN | 10 kDa heat shock protein, mitochondrial | HSPE1 | 4 | 45.1 | 0.017245 | -1.0431 |
| P40926 | MDHM_HUMAN | Malate dehydrogenase, mitochondrial | MDH2 | 12 | 49.7 | 0.017733 | -1.79747 |
| Q7Z2K6 | ERMP1_HUMAN | Endoplasmic reticulum metallopeptidase 1 | ERMP1 | 10 | 11.5 | 0.019223 | -0.62133 |
| P16930 | FAAA_HUMAN | Fumarylacetoacetase | FAH | 7 | 21.0 | 0.020913 | -0.5964 |
| Q6A163 | K1C39_HUMAN | Keratin, type I cytoskeletal 39 | KRT39 | - | - | 0.021708 | -1.34214 |
| P00492 | HPRT_HUMAN | Hypoxanthine-guanine phosphoribosyltransferase | HPRT1 | 8 | 42.7 | 0.021923 | -1.20183 |
| Q9UHW9 | S12A6_HUMAN | Solute carrier family 12 member 6 | SLC12A6 | 2 | 1.6 | 0.02313 | -0.7686 |
| P50552 | VASP_HUMAN | Vasodilator-stimulated phosphoprotein | VASP | 3 | 6.6 | 0.027315 | -1.01687 |
| P0DPA2 | VSIG8_HUMAN | V-set and immunoglobulin domain-containing protein 8 | VSIG8 | 4 | 8.7 | 0.028615 | -1.20742 |
| Q9NSB4 | KRT82_HUMAN | Keratin, type II cuticular Hb2 | KRT82 | - | - | 0.028956 | -1.18216 |
| P04406 | G3P_HUMAN | Glyceraldehyde-3-phosphate dehydrogenase | GAPDH | 21 | 75.2 | 0.029052 | -1.17391 |
| P28066 | PSA5_HUMAN | Proteasome subunit alpha type-5 | PSMA5 | 11 | 65.1 | 0.029108 | -0.58551 |
| Q719H9 | KCTD1_HUMAN | BTB/POZ domain-containing protein KCTD1 | KCTD1 | 3 | 13.2 | 0.030867 | -0.60167 |
| Q9NTM9 | CUTC_HUMAN | Copper homeostasis protein cutC homolog | CUTC | 3 | 16.5 | 0.031461 | -0.61434 |
| O75874 | IDHC_HUMAN | Isocitrate dehydrogenase [NADP] cytoplasmic | IDH1 | 12 | 39.4 | 0.033531 | -1.37315 |
| P80108 | PHLD_HUMAN | Phosphatidylinositol-glycan-specific phospholipase D | GPLD1 | 18 | 28.1 | 0.037578 | -0.61633 |
| P12081 | SYHC_HUMAN | Histidine--tRNA ligase, cytoplasmic | HARS | 12 | 29.3 | 0.039501 | -1.3257 |
| Q14CN4 | K2C72_HUMAN | Keratin, type II cytoskeletal 72 | KRT72 | - | - | 0.044354 | -1.94848 |
| P62834 | RAP1A_HUMAN | Ras-related protein Rap-1A | RAP1A | 3 | 22.3 | 0.045266 | -1.26605 |
| P49590 | SYHM_HUMAN | Probable histidine--tRNA ligase, mitochondrial | HARS2 | - | - | 0.045568 | -1.29881 |
| Q96CW1 | AP2M1_HUMAN | AP-2 complex subunit mu | AP2M1 | 1 | 3.9 | 0.048963 | -0.63466 |

**Supplementary Table 3** The functional classification involves molecular functions, biological processes, cellular components and pathways of 95 proteins that expressed in different age groups.

| Accession | ID | Description | Gene | GO Biological_Process | GO Molecular_Function | GO Cellular_Component | KOG Function-Categories | KOG Function-Description |
| --- | --- | --- | --- | --- | --- | --- | --- | --- |
| Q08380 | LG3BP_HUMAN | Galectin-3-binding protein | LGALS3BP | GO:0006968//cellular defense response;GO:0002576//platelet degranulation;GO:0007165//signal transduction;GO:0007155//cell adhesion | GO:0005044//scavenger receptor activity | GO:0005615//extracellular space;GO:0016020//membrane;GO:0072562//blood microparticle;GO:0031012//extracellular matrix;GO:0005576//extracellular region;GO:0031089//platelet dense granule lumen;GO:0005578//proteinaceous extracellular matrix;GO:0070062//extracellular exosome | Signal transduction mechanisms;General function prediction only | Proteins containing BTB/POZ and Kelch domains, involved in regulatory/signal transduction processes |
| P69905 | HBA_HUMAN | Hemoglobin subunit alpha | HBA1 | GO:0015701//bicarbonate transport;GO:0042744//hydrogen peroxide catabolic process;GO:0010942//positive regulation of cell death;GO:0098869//cellular oxidant detoxification;GO:0015671//oxygen transport;GO:0051291//protein heterooligomerization;GO:0042542//response to hydrogen peroxide;GO:0006898//receptor-mediated endocytosis | GO:0005344//oxygen carrier activity;GO:0005506//iron ion binding;GO:0020037//heme binding;GO:0019825//oxygen binding | GO:0022627//cytosolic small ribosomal subunit;GO:0005615//extracellular space;GO:0071682//endocytic vesicle lumen;GO:0016020//membrane;GO:0072562//blood microparticle;GO:0005833//hemoglobin complex;GO:0070062//extracellular exosome;GO:0005829//cytosol;GO:0005576//extracellular region;GO:0031838//haptoglobin-hemoglobin complex | Energy production and conversion | Globins and related hemoproteins |
| O75787 | RENR_HUMAN | Renin receptor | ATP6AP2 | GO:0060323//head morphogenesis;GO:0048069//eye pigmentation;GO:0021903//rostrocaudal neural tube patterning;GO:0032914//positive regulation of transforming growth factor beta1 production;GO:0002003//angiotensin maturation;GO:0043312//neutrophil degranulation;GO:0030177//positive regulation of Wnt signaling pathway;GO:0043408//regulation of MAPK cascade | GO:0019899//enzyme binding;GO:0004872//receptor activity | GO:0009897//external side of plasma membrane;GO:0070062//extracellular exosome;GO:0016021//integral component of membrane;GO:0044297//cell body;GO:0070821//tertiary granule membrane;GO:0101003//ficolin-1-rich granule membrane;GO:0043005//neuron projection;GO:0005886//plasma membrane | Energy production and conversion | ATPase membrane sector associated protein |
| P02652 | APOA2_HUMAN | Apolipoprotein A-II | APOA2 | GO:0060192//negative regulation of lipase activity;GO:0034384//high-density lipoprotein particle clearance;GO:0034375//high-density lipoprotein particle remodeling;GO:0006656//phosphatidylcholine biosynthetic process;GO:0034371//chylomicron remodeling;GO:0006869//lipid transport;GO:0031647//regulation of protein stability;GO:0030301//cholesterol transport;GO:0034374//low-density lipoprotein particle remodeling;GO:0010903//negative regulation of very-low-density lipoprotein particle remodeling;GO:0002526//acute inflammatory response;GO:0002740//negative regulation of cytokine secretion involved in immune response;GO:0001523//retinoid metabolic process;GO:0009395//phospholipid catabolic process;GO:0044267//cellular protein metabolic process;GO:0032375//negative regulation of cholesterol transport;GO:0033344//cholesterol efflux;GO:0033700//phospholipid efflux;GO:0018158//protein oxidation;GO:0051384//response to glucocorticoid;GO:0006641//triglyceride metabolic process;GO:0060621//negative regulation of cholesterol import;GO:0043687//post-translational protein modification;GO:0043691//reverse cholesterol transport;GO:0042632//cholesterol homeostasis;GO:0050996//positive regulation of lipid catabolic process;GO:0043627//response to estrogen;GO:0010873//positive regulation of cholesterol esterification;GO:0031100//animal organ regeneration;GO:0034378//chylomicron assembly;GO:0008203//cholesterol metabolic process;GO:0030300//regulation of intestinal cholesterol absorption;GO:0045416//positive regulation of interleukin-8 biosynthetic process;GO:0019216//regulation of lipid metabolic process;GO:0050995//negative regulation of lipid catabolic process;GO:0046340//diacylglycerol catabolic process;GO:0018206//peptidyl-methionine modification;GO:0042493//response to drug;GO:0034380//high-density lipoprotein particle assembly;GO:0009749//response to glucose;GO:0016032//viral process;GO:0060695//negative regulation of cholesterol transporter activity;GO:0034370//triglyceride-rich lipoprotein particle remodeling;GO:0042157//lipoprotein metabolic process | GO:0031072//heat shock protein binding;GO:0017127//cholesterol transporter activity;GO:0060228//phosphatidylcholine-sterol O-acyltransferase activator activity;GO:0034190//apolipoprotein receptor binding;GO:0005543//phospholipid binding;GO:0055102//lipase inhibitor activity;GO:0005319//lipid transporter activity;GO:0008035//high-density lipoprotein particle binding;GO:0008289//lipid binding;GO:0031210//phosphatidylcholine binding;GO:0046982//protein heterodimerization activity;GO:0015485//cholesterol binding;GO:0070653//high-density lipoprotein particle receptor binding;GO:0042803//protein homodimerization activity | GO:0042627//chylomicron;GO:0070062//extracellular exosome;GO:0072562//blood microparticle;GO:0034361//very-low-density lipoprotein particle;GO:0034364//high-density lipoprotein particle;GO:0034366//spherical high-density lipoprotein particle;GO:0005788//endoplasmic reticulum lumen;GO:0005829//cytosol;GO:0005576//extracellular region;GO:0005769//early endosome | - | - |
| P10909 | CLUS_HUMAN | Clusterin | CLU | GO:0032286//central nervous system myelin maintenance;GO:0032436//positive regulation of proteasomal ubiquitin-dependent protein catabolic process;GO:0019730//antimicrobial humoral response;GO:1902230//negative regulation of intrinsic apoptotic signaling pathway in response to DNA damage;GO:0050821//protein stabilization;GO:0045429//positive regulation of nitric oxide biosynthetic process;GO:1902998//positive regulation of neurofibrillary tangle assembly;GO:0061518//microglial cell proliferation;GO:0048260//positive regulation of receptor-mediated endocytosis;GO:1903573//negative regulation of response to endoplasmic reticulum stress;GO:0000902//cell morphogenesis;GO:1902430//negative regulation of amyloid-beta formation;GO:0009615//response to virus;GO:1900221//regulation of amyloid-beta clearance;GO:0032464//positive regulation of protein homooligomerization;GO:0032463//negative regulation of protein homooligomerization;GO:0051131//chaperone-mediated protein complex assembly;GO:0032760//positive regulation of tumor necrosis factor production;GO:1905895//negative regulation of cellular response to tunicamycin;GO:0017038//protein import;GO:1905892//negative regulation of cellular response to thapsigargin;GO:0001774//microglial cell activation;GO:1901216//positive regulation of neuron death;GO:0061077//chaperone-mediated protein folding;GO:0051092//positive regulation of NF-kappaB transcription factor activity;GO:2000060//positive regulation of protein ubiquitination involved in ubiquitin-dependent protein catabolic process;GO:1902847//regulation of neuronal signal transduction;GO:1905907//negative regulation of amyloid fibril formation;GO:1902949//positive regulation of tau-protein kinase activity;GO:0051788//response to misfolded protein;GO:1902004//positive regulation of amyloid-beta formation | GO:0001540//amyloid-beta binding;GO:0051087//chaperone binding;GO:0032403//protein complex binding;GO:0050750//low-density lipoprotein particle receptor binding;GO:0031625//ubiquitin protein ligase binding;GO:0051787//misfolded protein binding | GO:0031012//extracellular matrix;GO:0071944//cell periphery;GO:0072562//blood microparticle;GO:0005739//mitochondrion;GO:0048471//perinuclear region of cytoplasm;GO:0097418//neurofibrillary tangle;GO:0034366//spherical high-density lipoprotein particle;GO:0009986//cell surface;GO:0042583//chromaffin granule;GO:0043234//protein complex;GO:0070062//extracellular exosome;GO:0005576//extracellular region;GO:0097440//apical dendrite | - | - |
| O95969 | SG1D2_HUMAN | Secretoglobin family 1D member 2 | SCGB1D2 | GO:0007165//signal transduction |  | GO:0005615//extracellular space | - | - |
| O75326 | SEM7A_HUMAN | Semaphorin-7A | SEMA7A | GO:0048675//axon extension;GO:0060907//positive regulation of macrophage cytokine production;GO:0007229//integrin-mediated signaling pathway;GO:0045773//positive regulation of axon extension;GO:0050727//regulation of inflammatory response;GO:0021988//olfactory lobe development;GO:0006954//inflammatory response;GO:0006955//immune response;GO:0050919//negative chemotaxis;GO:0070374//positive regulation of ERK1 and ERK2 cascade;GO:0001649//osteoblast differentiation | GO:0005178//integrin binding;GO:0038191//neuropilin binding | GO:0016020//membrane;GO:0009897//external side of plasma membrane;GO:0005886//plasma membrane;GO:0031225//anchored component of membrane | Signal transduction mechanisms | Semaphorins |
| P61769 | B2MG_HUMAN | Beta-2-microglobulin | B2M | GO:0055072//iron ion homeostasis;GO:0048260//positive regulation of receptor-mediated endocytosis;GO:0002474//antigen processing and presentation of peptide antigen via MHC class I;GO:0002726//positive regulation of T cell cytokine production;GO:0045646//regulation of erythrocyte differentiation;GO:1904440//positive regulation of ferrous iron import across plasma membrane;GO:0019885//antigen processing and presentation of endogenous peptide antigen via MHC class I;GO:0033077//T cell differentiation in thymus;GO:0033216//ferric iron import;GO:0071283//cellular response to iron(III) ion;GO:0042026//protein refolding;GO:0002481//antigen processing and presentation of exogenous protein antigen via MHC class Ib, TAP-dependent;GO:0006955//immune response;GO:0001895//retina homeostasis;GO:0071281//cellular response to iron ion;GO:1904434//positive regulation of ferrous iron binding;GO:1900121//negative regulation of receptor binding;GO:0002237//response to molecule of bacterial origin;GO:0001916//positive regulation of T cell mediated cytotoxicity;GO:0010977//negative regulation of neuron projection development;GO:1904437//positive regulation of transferrin receptor binding | GO:0042802//identical protein binding | GO:0009897//external side of plasma membrane;GO:1990712//HFE-transferrin receptor complex;GO:0005925//focal adhesion;GO:0070062//extracellular exosome;GO:0005794//Golgi apparatus;GO:0042612//MHC class I protein complex;GO:0005829//cytosol;GO:0005576//extracellular region | - | - |
| P26447 | S10A4_HUMAN | Protein S100-A4 | S100A4 | GO:0001837//epithelial to mesenchymal transition;GO:0043123//positive regulation of I-kappaB kinase/NF-kappaB signaling | GO:0046914//transition metal ion binding;GO:0048306//calcium-dependent protein binding;GO:0003779//actin binding;GO:0050786//RAGE receptor binding;GO:0003723//RNA binding;GO:0042802//identical protein binding;GO:0005509//calcium ion binding | GO:0005615//extracellular space;GO:0070062//extracellular exosome;GO:0005634//nucleus;GO:0005576//extracellular region;GO:0043005//neuron projection;GO:0048471//perinuclear region of cytoplasm | - | - |
| P68871 | HBB_HUMAN | Hemoglobin subunit beta | HBB | GO:0007596//blood coagulation;GO:0015701//bicarbonate transport;GO:0045429//positive regulation of nitric oxide biosynthetic process;GO:0042744//hydrogen peroxide catabolic process;GO:0008217//regulation of blood pressure;GO:0010942//positive regulation of cell death;GO:0050880//regulation of blood vessel size;GO:0098869//cellular oxidant detoxification;GO:0015671//oxygen transport;GO:0070293//renal absorption;GO:0030185//nitric oxide transport;GO:0051291//protein heterooligomerization;GO:0042542//response to hydrogen peroxide;GO:0006898//receptor-mediated endocytosis;GO:0043312//neutrophil degranulation;GO:0070527//platelet aggregation | GO:0005344//oxygen carrier activity;GO:0005506//iron ion binding;GO:0020037//heme binding;GO:0031720//haptoglobin binding;GO:0019825//oxygen binding;GO:0030492//hemoglobin binding;GO:0004601//peroxidase activity | GO:1904813//ficolin-1-rich granule lumen;GO:0005615//extracellular space;GO:0071682//endocytic vesicle lumen;GO:0072562//blood microparticle;GO:0005833//hemoglobin complex;GO:1904724//tertiary granule lumen;GO:0070062//extracellular exosome;GO:0005829//cytosol;GO:0005576//extracellular region;GO:0031838//haptoglobin-hemoglobin complex | Energy production and conversion | Globins and related hemoproteins |
| P02647 | APOA1_HUMAN | Apolipoprotein A-I | APOA1 | GO:0060192//negative regulation of lipase activity;GO:0034115//negative regulation of heterotypic cell-cell adhesion;GO:0006656//phosphatidylcholine biosynthetic process;GO:0030325//adrenal gland development;GO:0006869//lipid transport;GO:0010804//negative regulation of tumor necrosis factor-mediated signaling pathway;GO:0070328//triglyceride homeostasis;GO:0035025//positive regulation of Rho protein signal transduction;GO:0008211//glucocorticoid metabolic process;GO:0010903//negative regulation of very-low-density lipoprotein particle remodeling;GO:0019915//lipid storage;GO:0060354//negative regulation of cell adhesion molecule production;GO:0042158//lipoprotein biosynthetic process;GO:0002740//negative regulation of cytokine secretion involved in immune response;GO:0044267//cellular protein metabolic process;GO:0050728//negative regulation of inflammatory response;GO:0051180//vitamin transport;GO:0014012//peripheral nervous system axon regeneration;GO:1900026//positive regulation of substrate adhesion-dependent cell spreading;GO:0033344//cholesterol efflux;GO:0055091//phospholipid homeostasis;GO:0007186//G-protein coupled receptor signaling pathway;GO:0007584//response to nutrient;GO:0033700//phospholipid efflux;GO:0018158//protein oxidation;GO:0006644//phospholipid metabolic process;GO:0031100//animal organ regeneration;GO:0043534//blood vessel endothelial cell migration;GO:0042632//cholesterol homeostasis;GO:0043627//response to estrogen;GO:0010873//positive regulation of cholesterol esterification;GO:0032489//regulation of Cdc42 protein signal transduction;GO:0043691//reverse cholesterol transport;GO:0051346//negative regulation of hydrolase activity;GO:0008203//cholesterol metabolic process;GO:0050713//negative regulation of interleukin-1 beta secretion;GO:0050821//protein stabilization;GO:0030300//regulation of intestinal cholesterol absorption;GO:0034375//high-density lipoprotein particle remodeling;GO:0070508//cholesterol import;GO:0007229//integrin-mediated signaling pathway;GO:0018206//peptidyl-methionine modification;GO:0042493//response to drug;GO:0051345//positive regulation of hydrolase activity;GO:0006695//cholesterol biosynthetic process;GO:0051496//positive regulation of stress fiber assembly;GO:0001932//regulation of protein phosphorylation;GO:0001935//endothelial cell proliferation;GO:0034380//high-density lipoprotein particle assembly;GO:0042157//lipoprotein metabolic process | GO:0031072//heat shock protein binding;GO:0008035//high-density lipoprotein particle binding;GO:0017127//cholesterol transporter activity;GO:0060228//phosphatidylcholine-sterol O-acyltransferase activator activity;GO:0034191//apolipoprotein A-I receptor binding;GO:0034190//apolipoprotein receptor binding;GO:0005548//phospholipid transporter activity;GO:0001540//amyloid-beta binding;GO:0005543//phospholipid binding;GO:0045499//chemorepellent activity;GO:0042802//identical protein binding;GO:0070653//high-density lipoprotein particle receptor binding;GO:0008289//lipid binding;GO:0019899//enzyme binding;GO:0055102//lipase inhibitor activity;GO:0015485//cholesterol binding | GO:0031012//extracellular matrix;GO:0030139//endocytic vesicle;GO:0042627//chylomicron;GO:0031410//cytoplasmic vesicle;GO:0005634//nucleus;GO:0072562//blood microparticle;GO:0034361//very-low-density lipoprotein particle;GO:0034363//intermediate-density lipoprotein particle;GO:0034364//high-density lipoprotein particle;GO:0034365//discoidal high-density lipoprotein particle;GO:0034366//spherical high-density lipoprotein particle;GO:0009986//cell surface;GO:0034362//low-density lipoprotein particle;GO:0070062//extracellular exosome;GO:0005576//extracellular region | - | - |
| P35237 | SPB6_HUMAN | Serpin B6 | SERPINB6 | GO:0071470//cellular response to osmotic stress;GO:0007605//sensory perception of sound;GO:0043312//neutrophil degranulation;GO:0010951//negative regulation of endopeptidase activity | GO:0002020//protease binding;GO:0004867//serine-type endopeptidase inhibitor activity | GO:0005737//cytoplasm;GO:0043234//protein complex;GO:0030667//secretory granule membrane;GO:0005615//extracellular space;GO:0005829//cytosol;GO:0005886//plasma membrane;GO:0070821//tertiary granule membrane;GO:0005576//extracellular region;GO:0101003//ficolin-1-rich granule membrane;GO:0070062//extracellular exosome | Defense mechanisms | Serpin |
| P00738 | HPT_HUMAN | Haptoglobin | HP | GO:0051354//negative regulation of oxidoreductase activity;GO:2000296//negative regulation of hydrogen peroxide catabolic process;GO:0042542//response to hydrogen peroxide;GO:0006898//receptor-mediated endocytosis;GO:0043312//neutrophil degranulation;GO:0006952//defense response;GO:0006953//acute-phase response;GO:0042742//defense response to bacterium;GO:0010942//positive regulation of cell death | GO:0004252//serine-type endopeptidase activity;GO:0030492//hemoglobin binding;GO:0016209//antioxidant activity | GO:0005615//extracellular space;GO:0071682//endocytic vesicle lumen;GO:0035580//specific granule lumen;GO:0072562//blood microparticle;GO:1904724//tertiary granule lumen;GO:0005576//extracellular region;GO:0031838//haptoglobin-hemoglobin complex;GO:0070062//extracellular exosome | Amino acid transport and metabolism | Trypsin |
| P60953 | CDC42_HUMAN | Cell division control protein 42 homolog | CDC42 | GO:0045198//establishment of epithelial cell apical/basal polarity;GO:0033138//positive regulation of peptidyl-serine phosphorylation;GO:0034332//adherens junction organization;GO:0030036//actin cytoskeleton organization;GO:0046847//filopodium assembly;GO:0010629//negative regulation of gene expression;GO:0010628//positive regulation of gene expression;GO:0035264//multicellular organism growth;GO:0051988//regulation of attachment of spindle microtubules to kinetochore;GO:0071338//positive regulation of hair follicle cell proliferation;GO:0035088//establishment or maintenance of apical/basal cell polarity;GO:0032488//Cdc42 protein signal transduction;GO:0090136//epithelial cell-cell adhesion;GO:0051491//positive regulation of filopodium assembly;GO:0051301//cell division;GO:0034329//cell junction assembly;GO:0043497//regulation of protein heterodimerization activity;GO:0032467//positive regulation of cytokinesis;GO:0007088//regulation of mitotic nuclear division;GO:0002040//sprouting angiogenesis;GO:0042176//regulation of protein catabolic process;GO:0060789//hair follicle placode formation;GO:0099563//modification of synaptic structure;GO:0048664//neuron fate determination;GO:0045859//regulation of protein kinase activity;GO:0060684//epithelial-mesenchymal cell signaling;GO:0045740//positive regulation of DNA replication;GO:0034613//cellular protein localization;GO:0060661//submandibular salivary gland formation;GO:0006911//phagocytosis, engulfment;GO:0060070//canonical Wnt signaling pathway;GO:0046330//positive regulation of JNK cascade;GO:0043552//positive regulation of phosphatidylinositol 3-kinase activity;GO:0072384//organelle transport along microtubule;GO:0090135//actin filament branching;GO:0007264//small GTPase mediated signal transduction;GO:0031069//hair follicle morphogenesis;GO:0007015//actin filament organization;GO:0007030//Golgi organization;GO:0036336//dendritic cell migration;GO:0006897//endocytosis;GO:0003161//cardiac conduction system development;GO:0060501//positive regulation of epithelial cell proliferation involved in lung morphogenesis;GO:0051489//regulation of filopodium assembly;GO:0031424//keratinization;GO:0051835//positive regulation of synapse structural plasticity;GO:0031647//regulation of protein stability;GO:0003334//keratinocyte development;GO:0090316//positive regulation of intracellular protein transport;GO:1900026//positive regulation of substrate adhesion-dependent cell spreading;GO:0060047//heart contraction;GO:0051017//actin filament bundle assembly;GO:0051683//establishment of Golgi localization;GO:0007097//nuclear migration;GO:0060997//dendritic spine morphogenesis;GO:0043525//positive regulation of neuron apoptotic process | GO:0051022//Rho GDP-dissociation inhibitor binding;GO:0034191//apolipoprotein A-I receptor binding;GO:0030742//GTP-dependent protein binding;GO:0031435//mitogen-activated protein kinase kinase kinase binding;GO:0005525//GTP binding;GO:0032427//GBD domain binding;GO:0003924//GTPase activity | GO:0042995//cell projection;GO:0000322//storage vacuole;GO:0072686//mitotic spindle;GO:0036464//cytoplasmic ribonucleoprotein granule;GO:0000139//Golgi membrane;GO:0005737//cytoplasm;GO:0043209//myelin sheath;GO:0005813//centrosome;GO:0016020//membrane;GO:0005815//microtubule organizing center;GO:0031256//leading edge membrane;GO:0031258//lamellipodium membrane;GO:0030141//secretory granule;GO:0045177//apical part of cell;GO:0005912//adherens junction;GO:0005911//cell-cell junction;GO:0051233//spindle midzone;GO:0005829//cytosol;GO:0030496//midbody;GO:0005622//intracellular;GO:0071944//cell periphery | General function prediction only | Ras-related small GTPase, Rho type |
| P23280 | CAH6_HUMAN | Carbonic anhydrase 6 | CA6 | GO:0015701//bicarbonate transport;GO:0001580//detection of chemical stimulus involved in sensory perception of bitter taste;GO:0006730//one-carbon metabolic process | GO:0008270//zinc ion binding;GO:0004089//carbonate dehydratase activity | GO:0005615//extracellular space;GO:0005829//cytosol;GO:0005576//extracellular region;GO:0070062//extracellular exosome | General function prediction only | Carbonic anhydrase |
| Q2TAY7 | SMU1_HUMAN | WD40 repeat-containing protein SMU1 | SMU1 | GO:0000381//regulation of alternative mRNA splicing, via spliceosome;GO:0008380//RNA splicing;GO:0006397//mRNA processing |  | GO:0005737//cytoplasm;GO:0016607//nuclear speck;GO:0005681//spliceosomal complex | General function prediction only | Conserved WD40 repeat-containing protein |
| P02671 | FIBA_HUMAN | Fibrinogen alpha chain | FGA | GO:0045087//innate immune response;GO:0045907//positive regulation of vasoconstriction;GO:0034116//positive regulation of heterotypic cell-cell adhesion;GO:0007596//blood coagulation;GO:2000261//negative regulation of blood coagulation, common pathway;GO:0007160//cell-matrix adhesion;GO:0045921//positive regulation of exocytosis;GO:0007165//signal transduction;GO:1902042//negative regulation of extrinsic apoptotic signaling pathway via death domain receptors;GO:0044267//cellular protein metabolic process;GO:1900026//positive regulation of substrate adhesion-dependent cell spreading;GO:0072378//blood coagulation, fibrin clot formation;GO:0002576//platelet degranulation;GO:0031639//plasminogen activation;GO:0030198//extracellular matrix organization;GO:0002224//toll-like receptor signaling pathway;GO:0043687//post-translational protein modification;GO:0006461//protein complex assembly;GO:0042730//fibrinolysis;GO:2000352//negative regulation of endothelial cell apoptotic process;GO:0051592//response to calcium ion;GO:0090277//positive regulation of peptide hormone secretion;GO:0043623//cellular protein complex assembly;GO:0030168//platelet activation;GO:0051258//protein polymerization;GO:0072377//blood coagulation, common pathway;GO:0050714//positive regulation of protein secretion;GO:0002250//adaptive immune response;GO:0043152//induction of bacterial agglutination;GO:0070374//positive regulation of ERK1 and ERK2 cascade;GO:0070527//platelet aggregation | GO:0005198//structural molecule activity;GO:0046872//metal ion binding;GO:0050839//cell adhesion molecule binding;GO:0030674//protein binding, bridging;GO:0005102//receptor binding | GO:0009897//external side of plasma membrane;GO:0005788//endoplasmic reticulum lumen;GO:1903561//extracellular vesicle;GO:0031091//platelet alpha granule;GO:0005615//extracellular space;GO:0031093//platelet alpha granule lumen;GO:0072562//blood microparticle;GO:0009986//cell surface;GO:0005938//cell cortex;GO:0005886//plasma membrane;GO:0070062//extracellular exosome;GO:0005577//fibrinogen complex;GO:0005576//extracellular region | General function prediction only | Ficolin and related extracellular proteins |
| P01011 | AACT_HUMAN | Alpha-1-antichymotrypsin | SERPINA3 | GO:0019216//regulation of lipid metabolic process;GO:0002576//platelet degranulation;GO:0043312//neutrophil degranulation;GO:0006953//acute-phase response;GO:0030277//maintenance of gastrointestinal epithelium;GO:0006954//inflammatory response | GO:0003677//DNA binding;GO:0004867//serine-type endopeptidase inhibitor activity | GO:0005615//extracellular space;GO:0031093//platelet alpha granule lumen;GO:0072562//blood microparticle;GO:0005622//intracellular;GO:0035578//azurophil granule lumen;GO:0005576//extracellular region;GO:0034774//secretory granule lumen;GO:0005634//nucleus;GO:0070062//extracellular exosome | Defense mechanisms | Serpin |
| P07355 | ANXA2_HUMAN | Annexin A2 | ANXA2 | GO:0048146//positive regulation of fibroblast proliferation;GO:1905581//positive regulation of low-density lipoprotein particle clearance;GO:0006900//vesicle budding from membrane;GO:0032804//negative regulation of low-density lipoprotein particle receptor catabolic process;GO:0001765//membrane raft assembly;GO:1905602//positive regulation of receptor-mediated endocytosis involved in cholesterol transport;GO:0031340//positive regulation of vesicle fusion;GO:0001525//angiogenesis;GO:1905599//positive regulation of low-density lipoprotein receptor activity;GO:0097066//response to thyroid hormone;GO:0052362//catabolism by host of symbiont protein;GO:0052405//negative regulation by host of symbiont molecular function;GO:0036035//osteoclast development;GO:0001921//positive regulation of receptor recycling;GO:0035722//interleukin-12-mediated signaling pathway;GO:0007589//body fluid secretion;GO:0051290//protein heterotetramerization;GO:0072659//protein localization to plasma membrane;GO:0044147//negative regulation of development of symbiont involved in interaction with host;GO:0042730//fibrinolysis;GO:0044090//positive regulation of vacuole organization;GO:0043312//neutrophil degranulation;GO:0001934//positive regulation of protein phosphorylation;GO:0030199//collagen fibril organization;GO:1905597//positive regulation of low-density lipoprotein particle receptor binding | GO:0048306//calcium-dependent protein binding;GO:0004859//phospholipase inhibitor activity;GO:0019834//phospholipase A2 inhibitor activity;GO:0044730//bone sialoprotein binding;GO:0005544//calcium-dependent phospholipid binding;GO:0005546//phosphatidylinositol-4,5-bisphosphate binding;GO:0005509//calcium ion binding;GO:0002020//protease binding;GO:0098641//cadherin binding involved in cell-cell adhesion;GO:0042802//identical protein binding;GO:0017137//Rab GTPase binding;GO:0008092//cytoskeletal protein binding;GO:0044548//S100 protein binding;GO:0098772//molecular function regulator;GO:0003723//RNA binding | GO:0019897//extrinsic component of plasma membrane;GO:0016020//membrane;GO:0031012//extracellular matrix;GO:0035578//azurophil granule lumen;GO:0005737//cytoplasm;GO:0001726//ruffle;GO:0043220//Schmidt-Lanterman incisure;GO:0005615//extracellular space;GO:0005634//nucleus;GO:0005811//lipid droplet;GO:0048471//perinuclear region of cytoplasm;GO:0031902//late endosome membrane;GO:0042383//sarcolemma;GO:0035749//myelin sheath adaxonal region;GO:0009986//cell surface;GO:0016323//basolateral plasma membrane;GO:0005913//cell-cell adherens junction;GO:0005938//cell cortex;GO:0005886//plasma membrane;GO:0045121//membrane raft;GO:1990667//PCSK9-AnxA2 complex;GO:0031982//vesicle;GO:0042470//melanosome;GO:0005604//basement membrane;GO:0070062//extracellular exosome;GO:0005829//cytosol;GO:0030496//midbody;GO:0044354//macropinosome;GO:0005765//lysosomal membrane;GO:0005576//extracellular region;GO:0005768//endosome;GO:0005769//early endosome | Intracellular trafficking, secretion, and vesicular transport | Annexin |
| P00918 | CAH2_HUMAN | Carbonic anhydrase 2 | CA2 | GO:0015701//bicarbonate transport;GO:0038166//angiotensin-activated signaling pathway;GO:0006730//one-carbon metabolic process;GO:0032849//positive regulation of cellular pH reduction;GO:0051453//regulation of intracellular pH;GO:0010043//response to zinc ion;GO:0044070//regulation of anion transport;GO:0002009//morphogenesis of an epithelium;GO:0001822//kidney development;GO:2001225//regulation of chloride transport;GO:0015670//carbon dioxide transport;GO:0032230//positive regulation of synaptic transmission, GABAergic;GO:0045780//positive regulation of bone resorption;GO:0043627//response to estrogen;GO:0009268//response to pH;GO:0046903//secretion;GO:0042475//odontogenesis of dentin-containing tooth;GO:0045672//positive regulation of osteoclast differentiation;GO:0071498//cellular response to fluid shear stress;GO:0048545//response to steroid hormone;GO:2001150//positive regulation of dipeptide transmembrane transport | GO:0008270//zinc ion binding;GO:0004089//carbonate dehydratase activity;GO:0004064//arylesterase activity | GO:0030424//axon;GO:0005902//microvillus;GO:0005737//cytoplasm;GO:0045177//apical part of cell;GO:0005615//extracellular space;GO:0043209//myelin sheath;GO:0016323//basolateral plasma membrane;GO:0005886//plasma membrane;GO:0070062//extracellular exosome;GO:0005829//cytosol | General function prediction only | Carbonic anhydrase |
| P01040 | CYTA_HUMAN | Cystatin-A | CSTA | GO:0018149//peptide cross-linking;GO:0030216//keratinocyte differentiation;GO:0098609//cell-cell adhesion;GO:0070268//cornification;GO:0010466//negative regulation of peptidase activity;GO:0045861//negative regulation of proteolysis | GO:0030674//protein binding, bridging;GO:0002020//protease binding;GO:0004869//cysteine-type endopeptidase inhibitor activity;GO:0005198//structural molecule activity | GO:0005737//cytoplasm;GO:0005615//extracellular space;GO:0005829//cytosol;GO:0005622//intracellular;GO:0031012//extracellular matrix;GO:0001533//cornified envelope;GO:0070062//extracellular exosome | - | - |
| A1L3X0 | ELOV7_HUMAN | Elongation of very long chain fatty acids protein 7 | ELOVL7 | GO:0030148//sphingolipid biosynthetic process;GO:0034625//fatty acid elongation, monounsaturated fatty acid;GO:0006636//unsaturated fatty acid biosynthetic process;GO:0042761//very long-chain fatty acid biosynthetic process;GO:0035338//long-chain fatty-acyl-CoA biosynthetic process;GO:0019367//fatty acid elongation, saturated fatty acid;GO:0034626//fatty acid elongation, polyunsaturated fatty acid | GO:0009922//fatty acid elongase activity;GO:0102337//3-oxo-cerotoyl-CoA synthase activity;GO:0102336//3-oxo-arachidoyl-CoA synthase activity;GO:0102338//3-oxo-lignoceronyl-CoA synthase activity;GO:0102756//very-long-chain 3-ketoacyl-CoA synthase activity | GO:0016021//integral component of membrane;GO:0005789//endoplasmic reticulum membrane;GO:0030176//integral component of endoplasmic reticulum membrane;GO:0005783//endoplasmic reticulum | Lipid transport and metabolism | Fatty acyl-CoA elongase/Polyunsaturated fatty acid specific elongation enzyme |
| P01034 | CYTC_HUMAN | Cystatin-C | CST3 | GO:0060009//Sertoli cell development;GO:0048678//response to axon injury;GO:0042747//circadian sleep/wake cycle, REM sleep;GO:0070301//cellular response to hydrogen peroxide;GO:0001666//response to hypoxia;GO:0044267//cellular protein metabolic process;GO:0032355//response to estradiol;GO:0007431//salivary gland development;GO:2000117//negative regulation of cysteine-type endopeptidase activity;GO:0009636//response to toxic substance;GO:0043067//regulation of programmed cell death;GO:0010466//negative regulation of peptidase activity;GO:0008284//positive regulation of cell proliferation;GO:0034103//regulation of tissue remodeling;GO:0045740//positive regulation of DNA replication;GO:0060548//negative regulation of cell death;GO:0043687//post-translational protein modification;GO:0006915//apoptotic process;GO:0006952//defense response;GO:0001775//cell activation;GO:0001654//eye development;GO:0060311//negative regulation of elastin catabolic process;GO:0060313//negative regulation of blood vessel remodeling;GO:0007420//brain development;GO:0009743//response to carbohydrate;GO:0010716//negative regulation of extracellular matrix disassembly;GO:0007566//embryo implantation;GO:0042493//response to drug;GO:0031667//response to nutrient levels;GO:0010711//negative regulation of collagen catabolic process;GO:0043312//neutrophil degranulation;GO:0045861//negative regulation of proteolysis;GO:0097435//supramolecular fiber organization | GO:0001540//amyloid-beta binding;GO:0002020//protease binding;GO:0042802//identical protein binding;GO:0004866//endopeptidase inhibitor activity;GO:0004869//cysteine-type endopeptidase inhibitor activity | GO:0005783//endoplasmic reticulum;GO:0005788//endoplasmic reticulum lumen;GO:0030424//axon;GO:1904724//tertiary granule lumen;GO:0005615//extracellular space;GO:0005771//multivesicular body;GO:0070062//extracellular exosome;GO:0048471//perinuclear region of cytoplasm;GO:0043025//neuronal cell body;GO:0031965//nuclear membrane;GO:1904813//ficolin-1-rich granule lumen;GO:0005604//basement membrane;GO:0005764//lysosome;GO:0005576//extracellular region;GO:0043292//contractile fiber | - | - |
| Q15631 | TSN_HUMAN | Translin | TSN | GO:0006310//DNA recombination;GO:0030422//production of siRNA involved in RNA interference;GO:0016070//RNA metabolic process | GO:0043565//sequence-specific DNA binding;GO:0004519//endonuclease activity;GO:0003723//RNA binding;GO:0003677//DNA binding;GO:0032403//protein complex binding;GO:0003697//single-stranded DNA binding;GO:0042802//identical protein binding;GO:0003729//mRNA binding | GO:0005737//cytoplasm;GO:0005829//cytosol;GO:0005634//nucleus | General function prediction only | Translin family protein |
| Q9UL25 | RAB21_HUMAN | Ras-related protein Rab-21 | RAB21 | GO:0061024//membrane organization;GO:0048260//positive regulation of receptor-mediated endocytosis;GO:0008089//anterograde axonal transport;GO:2000643//positive regulation of early endosome to late endosome transport;GO:0017157//regulation of exocytosis;GO:0030516//regulation of axon extension;GO:0030100//regulation of endocytosis;GO:0050775//positive regulation of dendrite morphogenesis;GO:0015031//protein transport | GO:0003924//GTPase activity;GO:0019003//GDP binding;GO:0005525//GTP binding | GO:0009898//cytoplasmic side of plasma membrane;GO:0005789//endoplasmic reticulum membrane;GO:0005925//focal adhesion;GO:0098559//cytoplasmic side of early endosome membrane;GO:0070062//extracellular exosome;GO:1904115//axon cytoplasm;GO:0043005//neuron projection;GO:0031901//early endosome membrane;GO:0032154//cleavage furrow;GO:0030659//cytoplasmic vesicle membrane;GO:0012506//vesicle membrane;GO:0032580//Golgi cisterna membrane;GO:0005829//cytosol;GO:0005802//trans-Golgi network;GO:0005768//endosome;GO:0005769//early endosome | General function prediction only | GTPase Rab21, small G protein superfamily |
| Q9ULI1 | NWD2_HUMAN | NACHT and WD repeat domain-containing protein 2 | NWD2 | - | - | - | General function prediction only | WD40 repeat-containing protein |
| P08582 | TRFM_HUMAN | Melanotransferrin | MELTF | GO:0044267//cellular protein metabolic process;GO:0097286//iron ion import;GO:0090091//positive regulation of extracellular matrix disassembly;GO:1900025//negative regulation of substrate adhesion-dependent cell spreading;GO:0006501//C-terminal protein lipidation;GO:0010756//positive regulation of plasminogen activation;GO:0043687//post-translational protein modification;GO:0055072//iron ion homeostasis | GO:0005506//iron ion binding | GO:0070062//extracellular exosome;GO:0009986//cell surface;GO:0005788//endoplasmic reticulum lumen;GO:0046658//anchored component of plasma membrane;GO:0005576//extracellular region;GO:0005887//integral component of plasma membrane;GO:0005886//plasma membrane | - | - |
| P16870 | CBPE_HUMAN | Carboxypeptidase E | CPE | GO:0030070//insulin processing;GO:0007218//neuropeptide signaling pathway;GO:0006464//cellular protein modification process;GO:0072657//protein localization to membrane;GO:0008152//metabolic process;GO:0003214//cardiac left ventricle morphogenesis;GO:0016055//Wnt signaling pathway | GO:0008270//zinc ion binding;GO:0004181//metallocarboxypeptidase activity;GO:0004180//carboxypeptidase activity;GO:0004185//serine-type carboxypeptidase activity;GO:0042043//neurexin family protein binding;GO:0050839//cell adhesion molecule binding | GO:0097060//synaptic membrane;GO:0005615//extracellular space;GO:0043025//neuronal cell body;GO:0005794//Golgi apparatus;GO:0030141//secretory granule;GO:0030667//secretory granule membrane;GO:0030658//transport vesicle membrane;GO:0005886//plasma membrane;GO:0070062//extracellular exosome;GO:0005576//extracellular region;GO:0005634//nucleus | General function prediction only | Zinc carboxypeptidase |
| P81605 | DCD_HUMAN | Dermcidin | DCD | GO:0019730//antimicrobial humoral response;GO:0031640//killing of cells of other organism;GO:0050832//defense response to fungus;GO:0050830//defense response to Gram-positive bacterium;GO:0050829//defense response to Gram-negative bacterium;GO:0061844//antimicrobial humoral immune response mediated by antimicrobial peptide;GO:0042742//defense response to bacterium | GO:0003723//RNA binding;GO:0008233//peptidase activity | GO:0005615//extracellular space;GO:0070062//extracellular exosome;GO:0031012//extracellular matrix;GO:0005576//extracellular region | - | - |
| P12273 | PIP_HUMAN | Prolactin-inducible protein | PIP | GO:0070233//negative regulation of T cell apoptotic process;GO:0001580//detection of chemical stimulus involved in sensory perception of bitter taste;GO:0002682//regulation of immune system process;GO:0006508//proteolysis;GO:0001895//retina homeostasis;GO:0055085//transmembrane transport;GO:0010628//positive regulation of gene expression | GO:0019864//IgG binding;GO:0003779//actin binding;GO:0004190//aspartic-type endopeptidase activity;GO:0046983//protein dimerization activity | GO:0005615//extracellular space;GO:0070062//extracellular exosome;GO:0005634//nucleus;GO:0016324//apical plasma membrane;GO:0005576//extracellular region | - | - |
| P30740 | ILEU_HUMAN | Leukocyte elastase inhibitor | SERPINB1 | GO:0043312//neutrophil degranulation | GO:0004867//serine-type endopeptidase inhibitor activity | GO:0005615//extracellular space;GO:0016020//membrane;GO:0031012//extracellular matrix;GO:0005576//extracellular region;GO:0034774//secretory granule lumen;GO:0070062//extracellular exosome | Defense mechanisms | Serpin |
| Q9HB07 | MYG1_HUMAN | UPF0160 protein MYG1, mitochondrial | C12orf10 | GO:0035641//locomotory exploration behavior |  | GO:0005654//nucleoplasm;GO:0070062//extracellular exosome;GO:0005739//mitochondrion | General function prediction only | Predicted metal-binding protein |
| Q14118 | DAG1_HUMAN | Dystroglycan | DAG1 | GO:0048714//positive regulation of oligodendrocyte differentiation;GO:0030336//negative regulation of cell migration;GO:1904261//positive regulation of basement membrane assembly involved in embryonic body morphogenesis;GO:0071260//cellular response to mechanical stimulus;GO:0019048//modulation by virus of host morphology or physiology;GO:0022011//myelination in peripheral nervous system;GO:0043403//skeletal muscle tissue regeneration;GO:0043409//negative regulation of MAPK cascade;GO:0034453//microtubule anchoring;GO:0060441//epithelial tube branching involved in lung morphogenesis;GO:0030198//extracellular matrix organization;GO:0006509//membrane protein ectodomain proteolysis;GO:0016476//regulation of embryonic cell shape;GO:0031103//axon regeneration;GO:0016340//calcium-dependent cell-matrix adhesion;GO:0006607//NLS-bearing protein import into nucleus;GO:0060055//angiogenesis involved in wound healing;GO:0007568//aging;GO:0043434//response to peptide hormone;GO:0007016//cytoskeletal anchoring at plasma membrane;GO:0006493//protein O-linked glycosylation;GO:0060445//branching involved in salivary gland morphogenesis;GO:0071397//cellular response to cholesterol;GO:0010717//regulation of epithelial to mesenchymal transition;GO:0001954//positive regulation of cell-matrix adhesion;GO:0002011//morphogenesis of an epithelial sheet;GO:0031643//positive regulation of myelination;GO:0014894//response to denervation involved in regulation of muscle adaptation;GO:0051898//negative regulation of protein kinase B signaling;GO:0010470//regulation of gastrulation;GO:0071711//basement membrane organization;GO:0045860//positive regulation of protein kinase activity;GO:0071679//commissural neuron axon guidance;GO:0021682//nerve maturation | GO:0017166//vinculin binding;GO:0042169//SH2 domain binding;GO:0051393//alpha-actinin binding;GO:0002162//dystroglycan binding;GO:0003779//actin binding;GO:0005509//calcium ion binding;GO:0015631//tubulin binding;GO:0008307//structural constituent of muscle;GO:0043237//laminin-1 binding;GO:0001618//virus receptor activity | GO:0009897//external side of plasma membrane;GO:0005788//endoplasmic reticulum lumen;GO:0031012//extracellular matrix;GO:0042383//sarcolemma;GO:0044853//plasma membrane raft;GO:0005925//focal adhesion;GO:0005737//cytoplasm;GO:0005615//extracellular space;GO:0016021//integral component of membrane;GO:0005654//nucleoplasm;GO:0016011//dystroglycan complex;GO:0070938//contractile ring;GO:0034399//nuclear periphery;GO:0045121//membrane raft;GO:0005856//cytoskeleton;GO:0005796//Golgi lumen;GO:0030027//lamellipodium;GO:0016323//basolateral plasma membrane;GO:0045211//postsynaptic membrane;GO:0005913//cell-cell adherens junction;GO:0005911//cell-cell junction;GO:0005886//plasma membrane;GO:0070062//extracellular exosome;GO:0030175//filopodium;GO:0005604//basement membrane;GO:0005829//cytosol;GO:0016010//dystrophin-associated glycoprotein complex;GO:0005576//extracellular region;GO:0033268//node of Ranvier;GO:0043034//costamere | Extracellular structures | Dystroglycan |
| Q9NQR4 | NIT2_HUMAN | Omega-amidase NIT2 | NIT2 | GO:0006528//asparagine metabolic process;GO:0006541//glutamine metabolic process;GO:0043312//neutrophil degranulation;GO:0006107//oxaloacetate metabolic process;GO:0006807//nitrogen compound metabolic process | GO:0050152//omega-amidase activity;GO:0016810//hydrolase activity, acting on carbon-nitrogen (but not peptide) bonds | GO:0070062//extracellular exosome;GO:0005813//centrosome;GO:0005829//cytosol;GO:0005739//mitochondrion;GO:0005576//extracellular region;GO:0035580//specific granule lumen;GO:1904724//tertiary granule lumen | Amino acid transport and metabolism | Carbon-nitrogen hydrolase |
| P35052 | GPC1_HUMAN | Glypican-1 | GPC1 | GO:0030203//glycosaminoglycan metabolic process;GO:0030200//heparan sulfate proteoglycan catabolic process;GO:0032288//myelin assembly;GO:0050900//leukocyte migration;GO:0007411//axon guidance;GO:2001016//positive regulation of skeletal muscle cell differentiation;GO:0001523//retinoid metabolic process;GO:0040037//negative regulation of fibroblast growth factor receptor signaling pathway;GO:0014037//Schwann cell differentiation;GO:0006027//glycosaminoglycan catabolic process;GO:0006024//glycosaminoglycan biosynthetic process | GO:0005507//copper ion binding;GO:0017134//fibroblast growth factor binding;GO:0043395//heparan sulfate proteoglycan binding;GO:0043236//laminin binding | GO:0031012//extracellular matrix;GO:0031225//anchored component of membrane;GO:0043202//lysosomal lumen;GO:0005615//extracellular space;GO:0005654//nucleoplasm;GO:0005796//Golgi lumen;GO:0005887//integral component of plasma membrane;GO:0005886//plasma membrane;GO:0070062//extracellular exosome;GO:0005829//cytosol;GO:0045121//membrane raft;GO:0005578//proteinaceous extracellular matrix;GO:0005576//extracellular region;GO:0005768//endosome | Signal transduction mechanisms | Heparin sulfate cell surface proteoglycan |
| P55072 | TERA_HUMAN | Transitional endoplasmic reticulum ATPase | VCP | GO:0032510//endosome to lysosome transport via multivesicular body sorting pathway;GO:1903007//positive regulation of Lys63-specific deubiquitinase activity;GO:1903006//positive regulation of protein K63-linked deubiquitination;GO:0032436//positive regulation of proteasomal ubiquitin-dependent protein catabolic process;GO:0019985//translesion synthesis;GO:0016236//macroautophagy;GO:0036503//ERAD pathway;GO:0006734//NADH metabolic process;GO:0034214//protein hexamerization;GO:1903862//positive regulation of oxidative phosphorylation;GO:2001171//positive regulation of ATP biosynthetic process;GO:1903715//regulation of aerobic respiration;GO:0006888//ER to Golgi vesicle-mediated transport;GO:0006302//double-strand break repair;GO:0045732//positive regulation of protein catabolic process;GO:0043161//proteasome-mediated ubiquitin-dependent protein catabolic process;GO:0051260//protein homooligomerization;GO:0030970//retrograde protein transport, ER to cytosol;GO:0097352//autophagosome maturation;GO:0018279//protein N-linked glycosylation via asparagine;GO:0006919//activation of cysteine-type endopeptidase activity involved in apoptotic process;GO:0019079//viral genome replication;GO:0046034//ATP metabolic process;GO:0006914//autophagy;GO:0031334//positive regulation of protein complex assembly;GO:0006974//cellular response to DNA damage stimulus;GO:0061857//endoplasmic reticulum stress-induced pre-emptive quality control;GO:0030433//ubiquitin-dependent ERAD pathway;GO:0010918//positive regulation of mitochondrial membrane potential;GO:0072389//flavin adenine dinucleotide catabolic process;GO:0070842//aggresome assembly;GO:0010498//proteasomal protein catabolic process;GO:0016567//protein ubiquitination;GO:0006511//ubiquitin-dependent protein catabolic process;GO:0071712//ER-associated misfolded protein catabolic process | GO:0016887//ATPase activity;GO:0031593//polyubiquitin modification-dependent protein binding;GO:0035800//deubiquitinase activator activity;GO:0044389//ubiquitin-like protein ligase binding;GO:0042802//identical protein binding;GO:0032403//protein complex binding;GO:0005524//ATP binding;GO:1990381//ubiquitin-specific protease binding;GO:0016787//hydrolase activity;GO:0042288//MHC class I protein binding;GO:0036435//K48-linked polyubiquitin modification-dependent protein binding;GO:0008289//lipid binding;GO:0019903//protein phosphatase binding;GO:0019904//protein domain specific binding;GO:0043531//ADP binding;GO:0031625//ubiquitin protein ligase binding;GO:1904288//BAT3 complex binding;GO:0003723//RNA binding;GO:0005102//receptor binding | GO:0005783//endoplasmic reticulum;GO:0005789//endoplasmic reticulum membrane;GO:0035578//azurophil granule lumen;GO:0005737//cytoplasm;GO:0043209//myelin sheath;GO:0005634//nucleus;GO:0005811//lipid droplet;GO:0005654//nucleoplasm;GO:1904949//ATPase complex;GO:0048471//perinuclear region of cytoplasm;GO:0036513//Derlin-1 retrotranslocation complex;GO:0034098//VCP-NPL4-UFD1 AAA ATPase complex;GO:0000502//proteasome complex;GO:1990730//VCP-NSFL1C complex;GO:0070062//extracellular exosome;GO:0043234//protein complex;GO:0043231//intracellular membrane-bounded organelle;GO:0035861//site of double-strand break;GO:0005829//cytosol | Posttranslational modification, protein turnover, chaperones | AAA+-type ATPase |
| O15296 | LX15B_HUMAN | Arachidonate 15-lipoxygenase B | ALOX15B | GO:0043651//linoleic acid metabolic process;GO:0051122//hepoxilin biosynthetic process;GO:0030336//negative regulation of cell migration;GO:0045926//negative regulation of growth;GO:0045786//negative regulation of cell cycle;GO:0030850//prostate gland development;GO:0030856//regulation of epithelial cell differentiation;GO:0010744//positive regulation of macrophage derived foam cell differentiation;GO:0045618//positive regulation of keratinocyte differentiation;GO:0019372//lipoxygenase pathway;GO:0008285//negative regulation of cell proliferation;GO:0006629//lipid metabolic process;GO:0090197//positive regulation of chemokine secretion;GO:0006915//apoptotic process;GO:0035360//positive regulation of peroxisome proliferator activated receptor signaling pathway;GO:0019369//arachidonic acid metabolic process | GO:0036403//arachidonate 8(S)-lipoxygenase activity;GO:0050473//arachidonate 15-lipoxygenase activity;GO:0005509//calcium ion binding;GO:0005506//iron ion binding;GO:0008289//lipid binding;GO:0016165//linoleate 13S-lipoxygenase activity | GO:0019898//extrinsic component of membrane;GO:0005856//cytoskeleton;GO:0070062//extracellular exosome;GO:0005634//nucleus;GO:0016020//membrane;GO:0005886//plasma membrane;GO:0005829//cytosol;GO:0005622//intracellular | - | - |
| P07195 | LDHB_HUMAN | L-lactate dehydrogenase B chain | LDHB | GO:0005975//carbohydrate metabolic process;GO:0019674//NAD metabolic process;GO:0006089//lactate metabolic process;GO:0019752//carboxylic acid metabolic process;GO:0006090//pyruvate metabolic process | GO:0051287//NAD binding;GO:0019900//kinase binding;GO:0004459//L-lactate dehydrogenase activity;GO:0042802//identical protein binding | GO:0005737//cytoplasm;GO:0045121//membrane raft;GO:0070062//extracellular exosome;GO:0043209//myelin sheath;GO:0005829//cytosol;GO:0016020//membrane;GO:0005739//mitochondrion | Energy production and conversion | Lactate dehydrogenase |
| P02545 | LMNA_HUMAN | Prelamin-A/C | LMNA | GO:0034504//protein localization to nucleus;GO:0055015//ventricular cardiac muscle cell development;GO:0090343//positive regulation of cell aging;GO:0090201//negative regulation of release of cytochrome c from mitochondria;GO:0035105//sterol regulatory element binding protein import into nucleus;GO:2001237//negative regulation of extrinsic apoptotic signaling pathway;GO:0007517//muscle organ development;GO:0030951//establishment or maintenance of microtubule cytoskeleton polarity;GO:0072201//negative regulation of mesenchymal cell proliferation;GO:0071456//cellular response to hypoxia;GO:0007084//mitotic nuclear envelope reassembly;GO:1903243//negative regulation of cardiac muscle hypertrophy in response to stress;GO:0008285//negative regulation of cell proliferation;GO:0030334//regulation of cell migration;GO:0034613//cellular protein localization;GO:0036498//IRE1-mediated unfolded protein response;GO:0007077//mitotic nuclear envelope disassembly;GO:1900180//regulation of protein localization to nucleus;GO:0032204//regulation of telomere maintenance;GO:0006998//nuclear envelope organization | GO:0005198//structural molecule activity;GO:0042802//identical protein binding | GO:0031012//extracellular matrix;GO:0016607//nuclear speck;GO:0005634//nucleus;GO:0005635//nuclear envelope;GO:0005654//nucleoplasm;GO:0005652//nuclear lamina;GO:0048471//perinuclear region of cytoplasm;GO:0031965//nuclear membrane;GO:0005882//intermediate filament;GO:0005638//lamin filament;GO:0005829//cytosol | Cell cycle control, cell division, chromosome partitioning;Nuclear structure | Nuclear envelope protein lamin, intermediate filament superfamily |
| O43278 | SPIT1_HUMAN | Kunitz-type protease inhibitor 1 | SPINT1 | GO:2000178//negative regulation of neural precursor cell proliferation;GO:0060674//placenta blood vessel development;GO:0060670//branching involved in labyrinthine layer morphogenesis;GO:0001843//neural tube closure;GO:0071773//cellular response to BMP stimulus;GO:0045687//positive regulation of glial cell differentiation;GO:0030198//extracellular matrix organization | GO:0004867//serine-type endopeptidase inhibitor activity | GO:0005615//extracellular space;GO:0070062//extracellular exosome;GO:0016021//integral component of membrane;GO:0016020//membrane;GO:0005576//extracellular region;GO:0005886//plasma membrane | Posttranslational modification, protein turnover, chaperones | Serine proteinase inhibitor (KU family) |
| P02763 | A1AG1_HUMAN | Alpha-1-acid glycoprotein 1 | ORM1 | GO:0050718//positive regulation of interleukin-1 beta secretion;GO:0002576//platelet degranulation;GO:0006810//transport;GO:0043312//neutrophil degranulation;GO:0006953//acute-phase response;GO:0032715//negative regulation of interleukin-6 production;GO:0002682//regulation of immune system process;GO:0006954//inflammatory response;GO:1904469//positive regulation of tumor necrosis factor secretion;GO:0032720//negative regulation of tumor necrosis factor production;GO:0050716//positive regulation of interleukin-1 secretion |  | GO:0005615//extracellular space;GO:0031093//platelet alpha granule lumen;GO:0070062//extracellular exosome;GO:0072562//blood microparticle;GO:0031012//extracellular matrix;GO:0005576//extracellular region;GO:0035580//specific granule lumen;GO:1904724//tertiary granule lumen | - | - |
| P06737 | PYGL_HUMAN | Glycogen phosphorylase, liver form | PYGL | GO:0042593//glucose homeostasis;GO:0005980//glycogen catabolic process;GO:0006015//5-phosphoribose 1-diphosphate biosynthetic process;GO:0070266//necroptotic process;GO:0005977//glycogen metabolic process;GO:0043312//neutrophil degranulation | GO:0008144//drug binding;GO:0030170//pyridoxal phosphate binding;GO:0008184//glycogen phosphorylase activity;GO:0002060//purine nucleobase binding;GO:0005524//ATP binding;GO:0042803//protein homodimerization activity;GO:0016208//AMP binding;GO:0032052//bile acid binding;GO:0102499//SHG alpha-glucan phosphorylase activity;GO:0019842//vitamin binding;GO:0102250//linear malto-oligosaccharide phosphorylase activity;GO:0005536//glucose binding | GO:1904813//ficolin-1-rich granule lumen;GO:0005737//cytoplasm;GO:0070062//extracellular exosome;GO:0034774//secretory granule lumen;GO:0005829//cytosol;GO:0005576//extracellular region | Carbohydrate transport and metabolism | Glycogen phosphorylase |
| P02774 | VTDB_HUMAN | Vitamin D-binding protein | GC | GO:0042359//vitamin D metabolic process;GO:0051180//vitamin transport | GO:0003779//actin binding;GO:0005499//vitamin D binding;GO:1902118//calcidiol binding | GO:0043202//lysosomal lumen;GO:0070062//extracellular exosome;GO:0005829//cytosol;GO:0072562//blood microparticle;GO:0005576//extracellular region;GO:0005615//extracellular space | - | - |
| Q9H190 | SDCB2_HUMAN | Syntenin-2 | SDCBP2 | GO:0046907//intracellular transport;GO:0007399//nervous system development;GO:0008283//cell proliferation;GO:0035556//intracellular signal transduction | GO:0008022//protein C-terminus binding;GO:0005546//phosphatidylinositol-4,5-bisphosphate binding;GO:0046982//protein heterodimerization activity;GO:0042802//identical protein binding;GO:0042803//protein homodimerization activity | GO:0005737//cytoplasm;GO:0016607//nuclear speck;GO:0005730//nucleolus;GO:0070062//extracellular exosome;GO:0005886//plasma membrane | General function prediction only | Beta amyloid precursor-binding protein |
| Q3MJ16 | PA24E_HUMAN | Cytosolic phospholipase A2 epsilon | PLA2G4E | GO:0009395//phospholipid catabolic process;GO:0006644//phospholipid metabolic process;GO:0036151//phosphatidylcholine acyl-chain remodeling;GO:0036150//phosphatidylserine acyl-chain remodeling;GO:0036152//phosphatidylethanolamine acyl-chain remodeling;GO:0036149//phosphatidylinositol acyl-chain remodeling | GO:0102568//phospholipase A2 activity consuming 1,2-dioleoylphosphatidylethanolamine);GO:0102567//phospholipase A2 activity (consuming 1,2-dipalmitoylphosphatidylcholine);GO:0004622//lysophospholipase activity;GO:0004623//phospholipase A2 activity;GO:0046872//metal ion binding;GO:0008970//phosphatidylcholine 1-acylhydrolase activity | GO:0005737//cytoplasm;GO:0005829//cytosol;GO:0005765//lysosomal membrane | Lipid transport and metabolism | Lysophospholipase |
| P00450 | CERU_HUMAN | Ceruloplasmin | CP | GO:0044267//cellular protein metabolic process;GO:0006879//cellular iron ion homeostasis;GO:0043687//post-translational protein modification;GO:0006825//copper ion transport | GO:0004322//ferroxidase activity;GO:0051087//chaperone binding;GO:0005507//copper ion binding | GO:0005615//extracellular space;GO:0005788//endoplasmic reticulum lumen;GO:0005765//lysosomal membrane;GO:0005576//extracellular region;GO:0072562//blood microparticle;GO:0070062//extracellular exosome | Secondary metabolites biosynthesis, transport and catabolism | Multicopper oxidases |
| P01023 | A2MG_HUMAN | Alpha-2-macroglobulin | A2M | GO:0051056//regulation of small GTPase mediated signal transduction;GO:0048863//stem cell differentiation;GO:0002576//platelet degranulation;GO:0007597//blood coagulation, intrinsic pathway;GO:0022617//extracellular matrix disassembly;GO:0001869//negative regulation of complement activation, lectin pathway | GO:0019966//interleukin-1 binding;GO:0019959//interleukin-8 binding;GO:0043120//tumor necrosis factor binding;GO:0048306//calcium-dependent protein binding;GO:0005096//GTPase activator activity;GO:0019838//growth factor binding;GO:0019899//enzyme binding;GO:0002020//protease binding;GO:0004867//serine-type endopeptidase inhibitor activity;GO:0005102//receptor binding | GO:0005829//cytosol;GO:0031093//platelet alpha granule lumen;GO:0005576//extracellular region;GO:0072562//blood microparticle;GO:0070062//extracellular exosome | Posttranslational modification, protein turnover, chaperones | Alpha-macroglobulin |
| Q9BYE2 | TMPSD_HUMAN | Transmembrane protease serine 13 | TMPRSS13 |  | GO:0004252//serine-type endopeptidase activity;GO:0005044//scavenger receptor activity | GO:0016021//integral component of membrane;GO:0072562//blood microparticle | Amino acid transport and metabolism | Trypsin |
| P0C869 | PA24B_HUMAN | Cytosolic phospholipase A2 beta | PLA2G4B | GO:0006654//phosphatidic acid biosynthetic process;GO:0036148//phosphatidylglycerol acyl-chain remodeling;GO:0006644//phospholipid metabolic process;GO:0019722//calcium-mediated signaling;GO:0036498//IRE1-mediated unfolded protein response;GO:0046475//glycerophospholipid catabolic process;GO:0006954//inflammatory response;GO:0036151//phosphatidylcholine acyl-chain remodeling;GO:0036150//phosphatidylserine acyl-chain remodeling;GO:0036152//phosphatidylethanolamine acyl-chain remodeling;GO:0007567//parturition;GO:0019369//arachidonic acid metabolic process | GO:0102568//phospholipase A2 activity consuming 1,2-dioleoylphosphatidylethanolamine);GO:0047498//calcium-dependent phospholipase A2 activity;GO:0005544//calcium-dependent phospholipid binding;GO:0005509//calcium ion binding;GO:0008970//phosphatidylcholine 1-acylhydrolase activity;GO:0102567//phospholipase A2 activity (consuming 1,2-dipalmitoylphosphatidylcholine);GO:0004622//lysophospholipase activity;GO:0004623//phospholipase A2 activity | GO:0031901//early endosome membrane;GO:0005829//cytosol;GO:0005743//mitochondrial inner membrane;GO:0005576//extracellular region | Lipid transport and metabolism | Lysophospholipase |
| P0DOX6 | IGM_HUMAN | Immunoglobulin mu heavy chain | N/A | - | - | - | - | - |
| P01008 | ANT3_HUMAN | Antithrombin-III | SERPINC1 | GO:0002438//acute inflammatory response to antigenic stimulus;GO:0007596//blood coagulation;GO:2000266//regulation of blood coagulation, intrinsic pathway;GO:0044267//cellular protein metabolic process;GO:0007595//lactation;GO:0007584//response to nutrient;GO:0043687//post-translational protein modification | GO:0002020//protease binding;GO:0004867//serine-type endopeptidase inhibitor activity;GO:0008201//heparin binding;GO:0042802//identical protein binding | GO:0005615//extracellular space;GO:0005886//plasma membrane;GO:0005788//endoplasmic reticulum lumen;GO:0005576//extracellular region;GO:0072562//blood microparticle;GO:0070062//extracellular exosome | Defense mechanisms | Serpin |
| P02679 | FIBG_HUMAN | Fibrinogen gamma chain | FGG | GO:1902042//negative regulation of extrinsic apoptotic signaling pathway via death domain receptors;GO:0045907//positive regulation of vasoconstriction;GO:0034116//positive regulation of heterotypic cell-cell adhesion;GO:0007596//blood coagulation;GO:0007160//cell-matrix adhesion;GO:0045921//positive regulation of exocytosis;GO:0007165//signal transduction;GO:0044267//cellular protein metabolic process;GO:0071354//cellular response to interleukin-6;GO:1900026//positive regulation of substrate adhesion-dependent cell spreading;GO:0036345//platelet maturation;GO:0002576//platelet degranulation;GO:0031639//plasminogen activation;GO:0030198//extracellular matrix organization;GO:0002224//toll-like receptor signaling pathway;GO:0043687//post-translational protein modification;GO:0090331//negative regulation of platelet aggregation;GO:0009306//protein secretion;GO:0042730//fibrinolysis;GO:2000352//negative regulation of endothelial cell apoptotic process;GO:0051592//response to calcium ion;GO:0090277//positive regulation of peptide hormone secretion;GO:0043623//cellular protein complex assembly;GO:0030168//platelet activation;GO:0051258//protein polymerization;GO:0050714//positive regulation of protein secretion;GO:0071347//cellular response to interleukin-1;GO:0072378//blood coagulation, fibrin clot formation;GO:0070374//positive regulation of ERK1 and ERK2 cascade;GO:0070527//platelet aggregation | GO:0005198//structural molecule activity;GO:0046872//metal ion binding;GO:0042803//protein homodimerization activity;GO:0050839//cell adhesion molecule binding;GO:0030674//protein binding, bridging;GO:0005102//receptor binding | GO:0009897//external side of plasma membrane;GO:0005788//endoplasmic reticulum lumen;GO:0031091//platelet alpha granule;GO:0005615//extracellular space;GO:0031093//platelet alpha granule lumen;GO:0072562//blood microparticle;GO:0009986//cell surface;GO:0005886//plasma membrane;GO:0070062//extracellular exosome;GO:0005577//fibrinogen complex;GO:0005576//extracellular region | General function prediction only | Ficolin and related extracellular proteins |
| P06732 | KCRM_HUMAN | Creatine kinase M-type | CKM | GO:0046314//phosphocreatine biosynthetic process;GO:0009408//response to heat;GO:0006600//creatine metabolic process | GO:0016301//kinase activity;GO:0004111//creatine kinase activity;GO:0005524//ATP binding | GO:0005615//extracellular space;GO:0005829//cytosol | Energy production and conversion | Creatine kinases |
| P50990 | TCPQ_HUMAN | T-complex protein 1 subunit theta | CCT8 | GO:0006457//protein folding;GO:0006458//'de novo' protein folding;GO:1904851//positive regulation of establishment of protein localization to telomere;GO:0050821//protein stabilization;GO:1904874//positive regulation of telomerase RNA localization to Cajal body;GO:1904871//positive regulation of protein localization to Cajal body;GO:1901998//toxin transport;GO:0046931//pore complex assembly;GO:0032212//positive regulation of telomere maintenance via telomerase;GO:0007339//binding of sperm to zona pellucida;GO:0061077//chaperone-mediated protein folding;GO:0043312//neutrophil degranulation | GO:0051082//unfolded protein binding;GO:0042623//ATPase activity, coupled;GO:0005524//ATP binding;GO:0044183//protein binding involved in protein folding;GO:0045296//cadherin binding | GO:0035578//azurophil granule lumen;GO:0005929//cilium;GO:0005874//microtubule;GO:0005737//cytoplasm;GO:0045111//intermediate filament cytoskeleton;GO:0005813//centrosome;GO:0005832//chaperonin-containing T-complex;GO:0005815//microtubule organizing center;GO:0005654//nucleoplasm;GO:0005576//extracellular region;GO:0044297//cell body;GO:0034774//secretory granule lumen;GO:0070062//extracellular exosome;GO:1904813//ficolin-1-rich granule lumen;GO:0005829//cytosol;GO:0002199//zona pellucida receptor complex | Posttranslational modification, protein turnover, chaperones | Chaperonin complex component, TCP-1 theta subunit (CCT8) |
| P43304 | GPDM_HUMAN | Glycerol-3-phosphate dehydrogenase, mitochondrial | GPD2 | GO:0019563//glycerol catabolic process;GO:0006127//glycerophosphate shuttle;GO:0035264//multicellular organism growth;GO:0006072//glycerol-3-phosphate metabolic process;GO:0043010//camera-type eye development;GO:0006094//gluconeogenesis | GO:0052591//sn-glycerol-3-phosphate:ubiquinone-8 oxidoreductase activity;GO:0004368//glycerol-3-phosphate dehydrogenase activity;GO:0005509//calcium ion binding | GO:0009331//glycerol-3-phosphate dehydrogenase complex;GO:0005743//mitochondrial inner membrane | Energy production and conversion | Glycerol-3-phosphate dehydrogenase |
| Q96DR8 | MUCL1_HUMAN | Mucin-like protein 1 | MUCL1 | GO:0016266//O-glycan processing;GO:0002223//stimulatory C-type lectin receptor signaling pathway |  | GO:0005796//Golgi lumen;GO:0005576//extracellular region;GO:0005886//plasma membrane | - | - |
| P02675 | FIBB_HUMAN | Fibrinogen beta chain | FGB | GO:1902042//negative regulation of extrinsic apoptotic signaling pathway via death domain receptors;GO:0045907//positive regulation of vasoconstriction;GO:0034116//positive regulation of heterotypic cell-cell adhesion;GO:0007596//blood coagulation;GO:0007160//cell-matrix adhesion;GO:0045921//positive regulation of exocytosis;GO:0007165//signal transduction;GO:0044320//cellular response to leptin stimulus;GO:1900026//positive regulation of substrate adhesion-dependent cell spreading;GO:0072378//blood coagulation, fibrin clot formation;GO:0002576//platelet degranulation;GO:0031639//plasminogen activation;GO:0002224//toll-like receptor signaling pathway;GO:0045087//innate immune response;GO:0042730//fibrinolysis;GO:2000352//negative regulation of endothelial cell apoptotic process;GO:0051592//response to calcium ion;GO:0090277//positive regulation of peptide hormone secretion;GO:0043623//cellular protein complex assembly;GO:0030168//platelet activation;GO:0051258//protein polymerization;GO:0050714//positive regulation of protein secretion;GO:0071347//cellular response to interleukin-1;GO:0030198//extracellular matrix organization;GO:0002250//adaptive immune response;GO:0043152//induction of bacterial agglutination;GO:0070374//positive regulation of ERK1 and ERK2 cascade;GO:0070527//platelet aggregation | GO:0051087//chaperone binding;GO:0005198//structural molecule activity;GO:0050839//cell adhesion molecule binding;GO:0030674//protein binding, bridging;GO:0005102//receptor binding | GO:0009897//external side of plasma membrane;GO:1903561//extracellular vesicle;GO:0031091//platelet alpha granule;GO:0005615//extracellular space;GO:0031093//platelet alpha granule lumen;GO:0072562//blood microparticle;GO:0005576//extracellular region;GO:0009986//cell surface;GO:0005938//cell cortex;GO:0005886//plasma membrane;GO:0070062//extracellular exosome;GO:0005577//fibrinogen complex | General function prediction only | Ficolin and related extracellular proteins |
| Q15018 | ABRX2_HUMAN | BRISC complex subunit Abraxas 2 | ABRAXAS2 | GO:0000278//mitotic cell cycle;GO:0016579//protein deubiquitination;GO:0002931//response to ischemia;GO:0008608//attachment of spindle microtubules to kinetochore;GO:0090307//mitotic spindle assembly;GO:0007059//chromosome segregation;GO:0051301//cell division;GO:0070536//protein K63-linked deubiquitination | GO:0008017//microtubule binding;GO:0031593//polyubiquitin modification-dependent protein binding | GO:0005737//cytoplasm;GO:0036449//microtubule minus-end;GO:0031616//spindle pole centrosome;GO:0005634//nucleus;GO:0030496//midbody;GO:0070552//BRISC complex;GO:0000922//spindle pole;GO:0005874//microtubule;GO:0005829//cytosol | - | - |
| Q8IV08 | PLD3_HUMAN | Phospholipase D3 | PLD3 | GO:0016042//lipid catabolic process | GO:0003824//catalytic activity;GO:0070290//N-acylphosphatidylethanolamine-specific phospholipase D activity;GO:0004630//phospholipase D activity | GO:0070062//extracellular exosome;GO:0016021//integral component of membrane;GO:0005789//endoplasmic reticulum membrane | General function prediction only | Predicted phospholipase D |
| Q9UEU0 | VTI1B_HUMAN | Vesicle transport through interaction with t-SNAREs homolog 1B | VTI1B | GO:0006904//vesicle docking involved in exocytosis;GO:0061025//membrane fusion;GO:0006888//ER to Golgi vesicle-mediated transport;GO:0006896//Golgi to vacuole transport;GO:0006886//intracellular protein transport;GO:0008283//cell proliferation;GO:1903076//regulation of protein localization to plasma membrane;GO:0006623//protein targeting to vacuole;GO:0042147//retrograde transport, endosome to Golgi;GO:0002576//platelet degranulation;GO:0006891//intra-Golgi vesicle-mediated transport;GO:0016192//vesicle-mediated transport;GO:0048280//vesicle fusion with Golgi apparatus | GO:0005484//SNAP receptor activity;GO:0019869//chloride channel inhibitor activity;GO:0000149//SNARE binding | GO:0043231//intracellular membrane-bounded organelle;GO:0008021//synaptic vesicle;GO:0055038//recycling endosome membrane;GO:0055037//recycling endosome;GO:0005789//endoplasmic reticulum membrane;GO:0031201//SNARE complex;GO:0031982//vesicle;GO:0031093//platelet alpha granule lumen;GO:0016021//integral component of membrane;GO:0048471//perinuclear region of cytoplasm;GO:0043025//neuronal cell body;GO:0031902//late endosome membrane;GO:0031901//early endosome membrane;GO:0005794//Golgi apparatus;GO:0012507//ER to Golgi transport vesicle membrane;GO:0005829//cytosol;GO:0005622//intracellular;GO:0005765//lysosomal membrane;GO:0005576//extracellular region | Intracellular trafficking, secretion, and vesicular transport | V-SNARE |
| Q99536 | VAT1_HUMAN | Synaptic vesicle membrane protein VAT-1 homolog | VAT1 | GO:0010637//negative regulation of mitochondrial fusion;GO:0043312//neutrophil degranulation | GO:0008270//zinc ion binding;GO:0016491//oxidoreductase activity | GO:0070062//extracellular exosome;GO:0016021//integral component of membrane;GO:0005741//mitochondrial outer membrane;GO:0035578//azurophil granule lumen;GO:0005576//extracellular region | Energy production and conversion;General function prediction only | Predicted quinone oxidoreductase |
| Q92764 | KRT35_HUMAN | Keratin, type I cuticular Ha5 | KRT35 | GO:0031424//keratinization;GO:0070268//cornification;GO:0009653//anatomical structure morphogenesis | GO:0005198//structural molecule activity | GO:0005615//extracellular space;GO:0005829//cytosol;GO:0005882//intermediate filament;GO:0070062//extracellular exosome | General function prediction only | Ankyrin repeat protein |
| O75531 | BAF_HUMAN | Barrier-to-autointegration factor | BANF1 | GO:0051169//nuclear transport;GO:0075713//establishment of integrated proviral latency;GO:0045071//negative regulation of viral genome replication;GO:0007084//mitotic nuclear envelope reassembly;GO:0007077//mitotic nuclear envelope disassembly;GO:0015074//DNA integration;GO:0009615//response to virus | GO:0008022//protein C-terminus binding;GO:0019899//enzyme binding;GO:0003677//DNA binding;GO:0042802//identical protein binding;GO:0042803//protein homodimerization activity;GO:0097726//LEM domain binding;GO:0047485//protein N-terminus binding | GO:0005737//cytoplasm;GO:0070062//extracellular exosome;GO:0005634//nucleus;GO:0005635//nuclear envelope;GO:0005654//nucleoplasm;GO:0005694//chromosome;GO:0000793//condensed chromosome;GO:0005829//cytosol | Chromatin structure and dynamics;Replication, recombination and repair | DNA-bridging protein BAF |
| Q16610 | ECM1_HUMAN | Extracellular matrix protein 1 | ECM1 | GO:0001503//ossification;GO:0007165//signal transduction;GO:0030502//negative regulation of bone mineralization;GO:0001525//angiogenesis;GO:0002576//platelet degranulation;GO:0045766//positive regulation of angiogenesis;GO:0010466//negative regulation of peptidase activity;GO:2000404//regulation of T cell migration;GO:0001960//negative regulation of cytokine-mediated signaling pathway;GO:0002828//regulation of type 2 immune response;GO:0006954//inflammatory response;GO:0031214//biomineral tissue development;GO:0001938//positive regulation of endothelial cell proliferation;GO:0006357//regulation of transcription from RNA polymerase II promoter;GO:0043123//positive regulation of I-kappaB kinase/NF-kappaB signaling | GO:0008022//protein C-terminus binding;GO:0019899//enzyme binding;GO:0004871//signal transducer activity;GO:0005134//interleukin-2 receptor binding;GO:0002020//protease binding;GO:0043236//laminin binding | GO:0031012//extracellular matrix;GO:0005615//extracellular space;GO:0005576//extracellular region;GO:0070062//extracellular exosome;GO:0031089//platelet dense granule lumen;GO:0005578//proteinaceous extracellular matrix | - | - |
| P19012 | K1C15_HUMAN | Keratin, type I cytoskeletal 15 | KRT15 | GO:0031424//keratinization;GO:0070268//cornification;GO:0008544//epidermis development | GO:0005200//structural constituent of cytoskeleton;GO:0005198//structural molecule activity;GO:0097110//scaffold protein binding | GO:0070062//extracellular exosome;GO:0005634//nucleus;GO:0005882//intermediate filament;GO:0005829//cytosol | General function prediction only | Ankyrin repeat protein |
| P35579 | MYH9_HUMAN | Myosin-9 | MYH9 | GO:0001701//in utero embryonic development;GO:0031032//actomyosin structure organization;GO:0030220//platelet formation;GO:0050900//leukocyte migration;GO:0030224//monocyte differentiation;GO:0001768//establishment of T cell polarity;GO:0032506//cytokinetic process;GO:0001525//angiogenesis;GO:0000904//cell morphogenesis involved in differentiation;GO:0031532//actin cytoskeleton reorganization;GO:0098609//cell-cell adhesion;GO:0006509//membrane protein ectodomain proteolysis;GO:1903923//positive regulation of protein processing in phagocytic vesicle;GO:0051295//establishment of meiotic spindle localization;GO:0000212//meiotic spindle organization;GO:0006911//phagocytosis, engulfment;GO:0015031//protein transport;GO:1903919//negative regulation of actin filament severing;GO:0007520//myoblast fusion;GO:0043534//blood vessel endothelial cell migration;GO:0030048//actin filament-based movement;GO:0070527//platelet aggregation;GO:0008360//regulation of cell shape;GO:0032796//uropod organization;GO:0007229//integrin-mediated signaling pathway | GO:0016887//ATPase activity;GO:0000146//microfilament motor activity;GO:0003779//actin binding;GO:0051015//actin filament binding;GO:0003774//motor activity;GO:0005524//ATP binding;GO:0003723//RNA binding;GO:0030898//actin-dependent ATPase activity;GO:0043531//ADP binding;GO:0043495//protein membrane anchor;GO:0045296//cadherin binding;GO:0005516//calmodulin binding;GO:0042803//protein homodimerization activity;GO:0019904//protein domain specific binding | GO:0097513//myosin II filament;GO:0015629//actin cytoskeleton;GO:0031012//extracellular matrix;GO:0031594//neuromuscular junction;GO:0005903//brush border;GO:0008180//COP9 signalosome;GO:0005737//cytoplasm;GO:0001725//stress fiber;GO:0001726//ruffle;GO:0005634//nucleus;GO:0016020//membrane;GO:0032154//cleavage furrow;GO:0016459//myosin complex;GO:0016460//myosin II complex;GO:0042641//actomyosin;GO:0005925//focal adhesion;GO:0031252//cell leading edge;GO:0008305//integrin complex;GO:0005819//spindle;GO:0005913//cell-cell adherens junction;GO:0001772//immunological synapse;GO:0005886//plasma membrane;GO:0070062//extracellular exosome;GO:0043234//protein complex;GO:0005826//actomyosin contractile ring;GO:0030863//cortical cytoskeleton;GO:0005829//cytosol;GO:0001931//uropod | Cytoskeleton | Myosin class II heavy chain |
| Q99436 | PSB7_HUMAN | Proteasome subunit beta type-7 | PSMB7 | GO:0090263//positive regulation of canonical Wnt signaling pathway;GO:0002479//antigen processing and presentation of exogenous peptide antigen via MHC class I, TAP-dependent;GO:0038061//NIK/NF-kappaB signaling;GO:0033209//tumor necrosis factor-mediated signaling pathway;GO:0051437//positive regulation of ubiquitin-protein ligase activity involved in regulation of mitotic cell cycle transition;GO:0051436//negative regulation of ubiquitin-protein ligase activity involved in mitotic cell cycle;GO:0061418//regulation of transcription from RNA polymerase II promoter in response to hypoxia;GO:0000209//protein polyubiquitination;GO:0043488//regulation of mRNA stability;GO:0043161//proteasome-mediated ubiquitin-dependent protein catabolic process;GO:0000165//MAPK cascade;GO:1902036//regulation of hematopoietic stem cell differentiation;GO:0016579//protein deubiquitination;GO:0002223//stimulatory C-type lectin receptor signaling pathway;GO:0090090//negative regulation of canonical Wnt signaling pathway;GO:0050852//T cell receptor signaling pathway;GO:0043687//post-translational protein modification;GO:0031146//SCF-dependent proteasomal ubiquitin-dependent protein catabolic process;GO:0031145//anaphase-promoting complex-dependent catabolic process;GO:0060071//Wnt signaling pathway, planar cell polarity pathway;GO:0010972//negative regulation of G2/M transition of mitotic cell cycle;GO:1903955//positive regulation of protein targeting to mitochondrion;GO:0055085//transmembrane transport;GO:0051603//proteolysis involved in cellular protein catabolic process;GO:0038095//Fc-epsilon receptor signaling pathway;GO:0043312//neutrophil degranulation;GO:0016032//viral process;GO:0006521//regulation of cellular amino acid metabolic process | GO:0004298//threonine-type endopeptidase activity | GO:0019774//proteasome core complex, beta-subunit complex;GO:1904813//ficolin-1-rich granule lumen;GO:0005737//cytoplasm;GO:0005839//proteasome core complex;GO:0005634//nucleus;GO:0005654//nucleoplasm;GO:0034774//secretory granule lumen;GO:0000502//proteasome complex;GO:0070062//extracellular exosome;GO:0005829//cytosol;GO:0005576//extracellular region | Posttranslational modification, protein turnover, chaperones | 20S proteasome, regulatory subunit beta type PSMB7/PSMB10/PUP1 |
| O95831 | AIFM1_HUMAN | Apoptosis-inducing factor 1, mitochondrial | AIFM1 | GO:1902065//response to L-glutamate;GO:0030261//chromosome condensation;GO:0043525//positive regulation of neuron apoptotic process;GO:0032981//mitochondrial respiratory chain complex I assembly;GO:0009636//response to toxic substance;GO:0043065//positive regulation of apoptotic process;GO:0070301//cellular response to hydrogen peroxide;GO:0030182//neuron differentiation;GO:0006919//activation of cysteine-type endopeptidase activity involved in apoptotic process;GO:0071392//cellular response to estradiol stimulus;GO:0006915//apoptotic process;GO:0051402//neuron apoptotic process;GO:1902510//regulation of apoptotic DNA fragmentation;GO:0002931//response to ischemia;GO:1904045//cellular response to aldosterone;GO:0090650//cellular response to oxygen-glucose deprivation;GO:0070059//intrinsic apoptotic signaling pathway in response to endoplasmic reticulum stress;GO:0071732//cellular response to nitric oxide | GO:0016174//NAD(P)H oxidase activity;GO:0003677//DNA binding;GO:0071949//FAD binding;GO:0016491//oxidoreductase activity;GO:0050660//flavin adenine dinucleotide binding;GO:0016651//oxidoreductase activity, acting on NAD(P)H;GO:0046983//protein dimerization activity | GO:0005634//nucleus;GO:0005739//mitochondrion;GO:0005758//mitochondrial intermembrane space;GO:0048471//perinuclear region of cytoplasm;GO:0005829//cytosol;GO:0005743//mitochondrial inner membrane | Signal transduction mechanisms | Programmed cell death 8 (apoptosis-inducing factor) |
| P46736 | BRCC3_HUMAN | Lys-63-specific deubiquitinase BRCC36 | BRCC3 | GO:0051301//cell division;GO:0010165//response to X-ray;GO:0031572//G2 DNA damage checkpoint;GO:0006302//double-strand break repair;GO:0007049//cell cycle;GO:0016579//protein deubiquitination;GO:0070537//histone H2A K63-linked deubiquitination;GO:0070536//protein K63-linked deubiquitination;GO:0006281//DNA repair;GO:0010212//response to ionizing radiation;GO:0006303//double-strand break repair via nonhomologous end joining;GO:0045739//positive regulation of DNA repair | GO:0061578//Lys63-specific deubiquitinase activity;GO:0031593//polyubiquitin modification-dependent protein binding;GO:0008237//metallopeptidase activity;GO:0046872//metal ion binding;GO:0030234//enzyme regulator activity;GO:0036459//thiol-dependent ubiquitinyl hydrolase activity;GO:0004843//thiol-dependent ubiquitin-specific protease activity | GO:0005737//cytoplasm;GO:0005634//nucleus;GO:0070552//BRISC complex;GO:0000922//spindle pole;GO:0005654//nucleoplasm;GO:0070531//BRCA1-A complex;GO:0005829//cytosol;GO:0000151//ubiquitin ligase complex;GO:0000152//nuclear ubiquitin ligase complex | Posttranslational modification, protein turnover, chaperones | 26S proteasome regulatory complex, subunit RPN11 |
| Q9HC35 | EMAL4_HUMAN | Echinoderm microtubule-associated protein-like 4 | EML4 | GO:0007017//microtubule-based process;GO:0000278//mitotic cell cycle | GO:0008017//microtubule binding | GO:0005737//cytoplasm;GO:0016020//membrane;GO:0015630//microtubule cytoskeleton;GO:0005874//microtubule | Function unknown | Uncharacterized conserved protein, contains HELP and WD40 domains |
| O00161 | SNP23_HUMAN | Synaptosomal-associated protein 23 | SNAP23 | GO:0006903//vesicle targeting;GO:0061025//membrane fusion;GO:0002553//histamine secretion by mast cell;GO:0002479//antigen processing and presentation of exogenous peptide antigen via MHC class I, TAP-dependent;GO:0016082//synaptic vesicle priming;GO:0006892//post-Golgi vesicle-mediated transport;GO:0043312//neutrophil degranulation;GO:0031629//synaptic vesicle fusion to presynaptic active zone membrane;GO:0015031//protein transport | GO:0005484//SNAP receptor activity;GO:0019905//syntaxin binding | GO:0035579//specific granule membrane;GO:0005925//focal adhesion;GO:0031201//SNARE complex;GO:0005737//cytoplasm;GO:0070821//tertiary granule membrane;GO:0070062//extracellular exosome;GO:0042629//mast cell granule;GO:0005654//nucleoplasm;GO:0043005//neuron projection;GO:0042581//specific granule;GO:0042582//azurophil granule;GO:0005913//cell-cell adherens junction;GO:0005886//plasma membrane;GO:0030670//phagocytic vesicle membrane;GO:0098793//presynapse | Intracellular trafficking, secretion, and vesicular transport | SNAP-25 (synaptosome-associated protein) component of SNARE complex |
| Q6ZNF0 | ACP7_HUMAN | Acid phosphatase type 7 | ACP7 |  | GO:0046872//metal ion binding;GO:0003993//acid phosphatase activity | GO:0005576//extracellular region | Carbohydrate transport and metabolism | Purple acid phosphatase |
| P33764 | S10A3_HUMAN | Protein S100-A3 | S100A3 |  | GO:0008270//zinc ion binding;GO:0005509//calcium ion binding | GO:0005829//cytosol;GO:0005730//nucleolus | - | - |
| Q9UL18 | AGO1_HUMAN | Protein argonaute-1 | AGO1 | GO:0010628//positive regulation of gene expression;GO:0031054//pre-miRNA processing;GO:0035280//miRNA loading onto RISC involved in gene silencing by miRNA;GO:0010586//miRNA metabolic process;GO:0010501//RNA secondary structure unwinding;GO:0038111//interleukin-7-mediated signaling pathway;GO:1901224//positive regulation of NIK/NF-kappaB signaling;GO:0060964//regulation of gene silencing by miRNA;GO:0031047//gene silencing by RNA;GO:0035278//miRNA mediated inhibition of translation;GO:0048015//phosphatidylinositol-mediated signaling;GO:0007223//Wnt signaling pathway, calcium modulating pathway;GO:0035194//posttranscriptional gene silencing by RNA;GO:0045652//regulation of megakaryocyte differentiation;GO:0000956//nuclear-transcribed mRNA catabolic process;GO:0045944//positive regulation of transcription from RNA polymerase II promoter;GO:0006351//transcription, DNA-templated;GO:0035196//production of miRNAs involved in gene silencing by miRNA | GO:0003676//nucleic acid binding;GO:0003723//RNA binding;GO:0044212//transcription regulatory region DNA binding;GO:0001047//core promoter binding;GO:0000993//RNA polymerase II core binding;GO:0035198//miRNA binding;GO:0003727//single-stranded RNA binding;GO:0003725//double-stranded RNA binding;GO:0000978//RNA polymerase II proximal promoter sequence-specific DNA binding;GO:0003743//translation initiation factor activity | GO:0035068//micro-ribonucleoprotein complex;GO:0005737//cytoplasm;GO:0005634//nucleus;GO:0030529//intracellular ribonucleoprotein complex;GO:0005654//nucleoplasm;GO:0070578//RISC-loading complex;GO:0005844//polysome;GO:0005829//cytosol;GO:0000932//P-body;GO:0016442//RISC complex | Translation, ribosomal structure and biogenesis | Translation initiation factor 2C (eIF-2C) and related proteins |
| P61604 | CH10_HUMAN | 10 kDa heat shock protein, mitochondrial | HSPE1 | GO:0006986//response to unfolded protein;GO:0006457//protein folding;GO:0006919//activation of cysteine-type endopeptidase activity involved in apoptotic process;GO:0051085//chaperone cofactor-dependent protein refolding;GO:0001649//osteoblast differentiation | GO:0005524//ATP binding;GO:0051082//unfolded protein binding;GO:0003723//RNA binding;GO:0051087//chaperone binding;GO:0046872//metal ion binding | GO:0005737//cytoplasm;GO:0070062//extracellular exosome;GO:0016020//membrane;GO:0005739//mitochondrion;GO:0005759//mitochondrial matrix | Posttranslational modification, protein turnover, chaperones | Mitochondrial chaperonin |
| P40926 | MDHM_HUMAN | Malate dehydrogenase, mitochondrial | MDH2 | GO:0006734//NADH metabolic process;GO:0005975//carbohydrate metabolic process;GO:0006475//internal protein amino acid acetylation;GO:0006107//oxaloacetate metabolic process;GO:0006099//tricarboxylic acid cycle;GO:0009060//aerobic respiration;GO:0006108//malate metabolic process;GO:0006094//gluconeogenesis | GO:0046554//malate dehydrogenase (NADP+) activity;GO:0003723//RNA binding;GO:0030060//L-malate dehydrogenase activity;GO:0042803//protein homodimerization activity;GO:0043621//protein self-association | GO:0070062//extracellular exosome;GO:0043209//myelin sheath;GO:0005634//nucleus;GO:0005739//mitochondrion;GO:0005743//mitochondrial inner membrane;GO:0005759//mitochondrial matrix | Energy production and conversion | NAD-dependent malate dehydrogenase |
| Q7Z2K6 | ERMP1_HUMAN | Endoplasmic reticulum metallopeptidase 1 | ERMP1 |  | GO:0046872//metal ion binding;GO:0008237//metallopeptidase activity | GO:0016021//integral component of membrane;GO:0016020//membrane;GO:0005789//endoplasmic reticulum membrane | Posttranslational modification, protein turnover, chaperones;General function prediction only | Aminopeptidases of the M20 family |
| P16930 | FAAA_HUMAN | Fumarylacetoacetase | FAH | GO:0006572//tyrosine catabolic process;GO:0006559//L-phenylalanine catabolic process;GO:0006527//arginine catabolic process;GO:0009072//aromatic amino acid family metabolic process | GO:0004334//fumarylacetoacetase activity;GO:0046872//metal ion binding | GO:0070062//extracellular exosome;GO:0005829//cytosol | Carbohydrate transport and metabolism | Fumarylacetoacetase |
| Q6A163 | K1C39_HUMAN | Keratin, type I cytoskeletal 39 | KRT39 | GO:0031424//keratinization;GO:0070268//cornification | GO:0005198//structural molecule activity | GO:0005829//cytosol;GO:0005882//intermediate filament | General function prediction only | Ankyrin repeat protein |
| P00492 | HPRT_HUMAN | Hypoxanthine-guanine phosphoribosyltransferase | HPRT1 | GO:0051289//protein homotetramerization;GO:0046040//IMP metabolic process;GO:0046100//hypoxanthine metabolic process;GO:0046651//lymphocyte proliferation;GO:0006178//guanine salvage;GO:0043103//hypoxanthine salvage;GO:0043101//purine-containing compound salvage;GO:0007626//locomotory behavior;GO:0007625//grooming behavior;GO:0046038//GMP catabolic process;GO:0021756//striatum development;GO:0042417//dopamine metabolic process;GO:0021954//central nervous system neuron development;GO:0021895//cerebral cortex neuron differentiation;GO:0019835//cytolysis;GO:0032264//IMP salvage;GO:0001975//response to amphetamine;GO:0048813//dendrite morphogenesis;GO:0006166//purine ribonucleoside salvage;GO:0006164//purine nucleotide biosynthetic process;GO:0045964//positive regulation of dopamine metabolic process;GO:0006168//adenine salvage | GO:0052657//guanine phosphoribosyltransferase activity;GO:0004422//hypoxanthine phosphoribosyltransferase activity;GO:0000287//magnesium ion binding;GO:0000166//nucleotide binding;GO:0042802//identical protein binding;GO:0042803//protein homodimerization activity;GO:0046872//metal ion binding | GO:0005737//cytoplasm;GO:0070062//extracellular exosome;GO:0005829//cytosol | Nucleotide transport and metabolism | Hypoxanthine-guanine phosphoribosyltransferase |
| Q9UHW9 | S12A6_HUMAN | Solute carrier family 12 member 6 | SLC12A6 | GO:0006811//ion transport;GO:0071477//cellular hypotonic salinity response;GO:0071476//cellular hypotonic response;GO:0007268//chemical synaptic transmission;GO:0010107//potassium ion import;GO:0035826//rubidium ion transport;GO:0001525//angiogenesis | GO:0015379//potassium:chloride symporter activity;GO:0022820//potassium ion symporter activity;GO:0019901//protein kinase binding;GO:0035827//rubidium ion transmembrane transporter activity;GO:0015079//potassium ion transmembrane transporter activity | GO:0005886//plasma membrane;GO:0016323//basolateral plasma membrane;GO:0005887//integral component of plasma membrane;GO:0016021//integral component of membrane | Inorganic ion transport and metabolism | K+/Cl- cotransporter KCC1 and related transporters |
| P50552 | VASP_HUMAN | Vasodilator-stimulated phosphoprotein | VASP | GO:0051289//protein homotetramerization;GO:0007411//axon guidance;GO:0030838//positive regulation of actin filament polymerization;GO:0001843//neural tube closure;GO:0008154//actin polymerization or depolymerization;GO:0034329//cell junction assembly | GO:0017124//SH3 domain binding;GO:0045296//cadherin binding;GO:0003779//actin binding;GO:0005522//profilin binding | GO:0015629//actin cytoskeleton;GO:0030175//filopodium;GO:0005925//focal adhesion;GO:0005923//bicellular tight junction;GO:0005856//cytoskeleton;GO:0070062//extracellular exosome;GO:0005737//cytoplasm;GO:0031258//lamellipodium membrane;GO:0030027//lamellipodium;GO:0005886//plasma membrane;GO:0042995//cell projection;GO:0005829//cytosol;GO:0031527//filopodium membrane | Signal transduction mechanisms | Signal transduction protein Enabled, contains WH1 domain |
| P0DPA2 | VSIG8_HUMAN | V-set and immunoglobulin domain-containing protein 8 | VSIG8 |  | GO:0003723//RNA binding | GO:0016021//integral component of membrane;GO:0005622//intracellular | - | - |
| Q9NSB4 | KRT82_HUMAN | Keratin, type II cuticular Hb2 | KRT82 | GO:0031424//keratinization;GO:0070268//cornification | GO:0005198//structural molecule activity;GO:0030280//structural constituent of epidermis | GO:0005829//cytosol;GO:0045095//keratin filament | Posttranslational modification, protein turnover, chaperones | Chaperone-dependent E3 ubiquitin protein ligase (contains TPR repeats) |
| P04406 | G3P_HUMAN | Glyceraldehyde-3-phosphate dehydrogenase | GAPDH | GO:0050821//protein stabilization;GO:0000226//microtubule cytoskeleton organization;GO:0006096//glycolytic process;GO:0061844//antimicrobial humoral immune response mediated by antimicrobial peptide;GO:0051873//killing by host of symbiont cells;GO:0035606//peptidyl-cysteine S-trans-nitrosylation;GO:0050832//defense response to fungus;GO:0051402//neuron apoptotic process;GO:0052501//positive regulation by organism of apoptotic process in other organism involved in symbiotic interaction;GO:0050715//positive regulation of cytokine secretion;GO:0071346//cellular response to interferon-gamma;GO:0017148//negative regulation of translation;GO:0006417//regulation of translation;GO:0006006//glucose metabolic process | GO:0051287//NAD binding;GO:0097718//disordered domain specific binding;GO:0004365//glyceraldehyde-3-phosphate dehydrogenase (NAD+) (phosphorylating) activity;GO:0042802//identical protein binding;GO:0035605//peptidyl-cysteine S-nitrosylase activity;GO:0008017//microtubule binding;GO:0050661//NADP binding;GO:0019828//aspartic-type endopeptidase inhibitor activity | GO:0031012//extracellular matrix;GO:0005737//cytoplasm;GO:0070062//extracellular exosome;GO:0005634//nucleus;GO:0005811//lipid droplet;GO:0030529//intracellular ribonucleoprotein complex;GO:0097452//GAIT complex;GO:0015630//microtubule cytoskeleton;GO:0031965//nuclear membrane;GO:0005886//plasma membrane;GO:0005829//cytosol | Carbohydrate transport and metabolism | Glyceraldehyde 3-phosphate dehydrogenase |
| P28066 | PSA5_HUMAN | Proteasome subunit alpha type-5 | PSMA5 | GO:0090263//positive regulation of canonical Wnt signaling pathway;GO:0002479//antigen processing and presentation of exogenous peptide antigen via MHC class I, TAP-dependent;GO:0038061//NIK/NF-kappaB signaling;GO:0033209//tumor necrosis factor-mediated signaling pathway;GO:0051437//positive regulation of ubiquitin-protein ligase activity involved in regulation of mitotic cell cycle transition;GO:0051436//negative regulation of ubiquitin-protein ligase activity involved in mitotic cell cycle;GO:0061418//regulation of transcription from RNA polymerase II promoter in response to hypoxia;GO:0000209//protein polyubiquitination;GO:0043488//regulation of mRNA stability;GO:0043161//proteasome-mediated ubiquitin-dependent protein catabolic process;GO:0000165//MAPK cascade;GO:1902036//regulation of hematopoietic stem cell differentiation;GO:0016579//protein deubiquitination;GO:0002223//stimulatory C-type lectin receptor signaling pathway;GO:0090090//negative regulation of canonical Wnt signaling pathway;GO:0050852//T cell receptor signaling pathway;GO:0043687//post-translational protein modification;GO:0031146//SCF-dependent proteasomal ubiquitin-dependent protein catabolic process;GO:0031145//anaphase-promoting complex-dependent catabolic process;GO:0060071//Wnt signaling pathway, planar cell polarity pathway;GO:0010972//negative regulation of G2/M transition of mitotic cell cycle;GO:0055085//transmembrane transport;GO:0038095//Fc-epsilon receptor signaling pathway;GO:0043312//neutrophil degranulation;GO:0006521//regulation of cellular amino acid metabolic process | GO:0004298//threonine-type endopeptidase activity | GO:1904813//ficolin-1-rich granule lumen;GO:0005737//cytoplasm;GO:0005839//proteasome core complex;GO:0005634//nucleus;GO:0005654//nucleoplasm;GO:0019773//proteasome core complex, alpha-subunit complex;GO:0034774//secretory granule lumen;GO:0000502//proteasome complex;GO:0070062//extracellular exosome;GO:0005829//cytosol;GO:0005576//extracellular region | Posttranslational modification, protein turnover, chaperones | 20S proteasome, regulatory subunit alpha type PSMA5/PUP2 |
| Q719H9 | KCTD1_HUMAN | BTB/POZ domain-containing protein KCTD1 | KCTD1 | GO:0000122//negative regulation of transcription from RNA polymerase II promoter;GO:0051260//protein homooligomerization;GO:0045892//negative regulation of transcription, DNA-templated;GO:0006351//transcription, DNA-templated | GO:0003714//transcription corepressor activity;GO:0008134//transcription factor binding;GO:0042802//identical protein binding | GO:0005634//nucleus;GO:0005654//nucleoplasm | General function prediction only | Uncharacterized conserved protein, contains BTB/POZ domain |
| Q9NTM9 | CUTC_HUMAN | Copper homeostasis protein cutC homolog | CUTC | GO:0051262//protein tetramerization;GO:0055070//copper ion homeostasis;GO:0006825//copper ion transport | GO:0005507//copper ion binding | GO:0005737//cytoplasm;GO:0005730//nucleolus;GO:0005634//nucleus;GO:0005654//nucleoplasm;GO:0005829//cytosol | Inorganic ion transport and metabolism | Predicted Cu2+ homeostasis protein CutC |
| O75874 | IDHC_HUMAN | Isocitrate dehydrogenase [NADP] cytoplasmic | IDH1 | GO:0008585//female gonad development;GO:0006099//tricarboxylic acid cycle;GO:0006097//glyoxylate cycle;GO:0006749//glutathione metabolic process;GO:0006979//response to oxidative stress;GO:0060696//regulation of phospholipid catabolic process;GO:0043312//neutrophil degranulation;GO:0071071//regulation of phospholipid biosynthetic process;GO:0006103//2-oxoglutarate metabolic process;GO:0006102//isocitrate metabolic process;GO:0006740//NADPH regeneration;GO:0048545//response to steroid hormone | GO:0051287//NAD binding;GO:0051990//(R)-2-hydroxyglutarate dehydrogenase activity;GO:0050661//NADP binding;GO:0000287//magnesium ion binding;GO:0042802//identical protein binding;GO:0042803//protein homodimerization activity;GO:0045296//cadherin binding;GO:0004450//isocitrate dehydrogenase (NADP+) activity;GO:0005102//receptor binding | GO:0005782//peroxisomal matrix;GO:1904813//ficolin-1-rich granule lumen;GO:0005737//cytoplasm;GO:0070062//extracellular exosome;GO:0005777//peroxisome;GO:0005739//mitochondrion;GO:1904724//tertiary granule lumen;GO:0034774//secretory granule lumen;GO:0005829//cytosol;GO:0005576//extracellular region | Energy production and conversion | NADP-dependent isocitrate dehydrogenase |
| P80108 | PHLD_HUMAN | Phosphatidylinositol-glycan-specific phospholipase D | GPLD1 | GO:0035774//positive regulation of insulin secretion involved in cellular response to glucose stimulus;GO:0051044//positive regulation of membrane protein ectodomain proteolysis;GO:0051047//positive regulation of secretion;GO:0035690//cellular response to drug;GO:0010907//positive regulation of glucose metabolic process;GO:0001503//ossification;GO:0032869//cellular response to insulin stimulus;GO:0010867//positive regulation of triglyceride biosynthetic process;GO:0043065//positive regulation of apoptotic process;GO:0002430//complement receptor mediated signaling pathway;GO:0071401//cellular response to triglyceride;GO:0006501//C-terminal protein lipidation;GO:0045919//positive regulation of cytolysis;GO:0071467//cellular response to pH;GO:0097241//hematopoietic stem cell migration to bone marrow;GO:0006507//GPI anchor release;GO:0010897//negative regulation of triglyceride catabolic process;GO:0002062//chondrocyte differentiation;GO:0035701//hematopoietic stem cell migration;GO:0002042//cell migration involved in sprouting angiogenesis;GO:0008285//negative regulation of cell proliferation;GO:0008286//insulin receptor signaling pathway;GO:0010983//positive regulation of high-density lipoprotein particle clearance;GO:1900076//regulation of cellular response to insulin stimulus;GO:0071397//cellular response to cholesterol;GO:0071277//cellular response to calcium ion;GO:0010595//positive regulation of endothelial cell migration;GO:0070633//transepithelial transport;GO:0009749//response to glucose;GO:0046470//phosphatidylcholine metabolic process;GO:0010694//positive regulation of alkaline phosphatase activity | GO:0004630//phospholipase D activity;GO:0017080//sodium channel regulator activity;GO:0004621//glycosylphosphatidylinositol phospholipase D activity | GO:0005622//intracellular;GO:0005737//cytoplasm;GO:0005615//extracellular space;GO:0070062//extracellular exosome;GO:0043231//intracellular membrane-bounded organelle;GO:0005765//lysosomal membrane;GO:0005576//extracellular region;GO:0005578//proteinaceous extracellular matrix | Extracellular structures | Vitronectin receptor, alpha subunit |
| P12081 | SYHC_HUMAN | Histidine--tRNA ligase, cytoplasmic | HARS | GO:0006427//histidyl-tRNA aminoacylation;GO:0032543//mitochondrial translation;GO:0006418//tRNA aminoacylation for protein translation;GO:0006412//translation | GO:0004821//histidine-tRNA ligase activity;GO:0042802//identical protein binding;GO:0005524//ATP binding | GO:0005737//cytoplasm;GO:0005829//cytosol;GO:0005739//mitochondrion | Translation, ribosomal structure and biogenesis | Histidyl-tRNA synthetase |
| Q14CN4 | K2C72_HUMAN | Keratin, type II cytoskeletal 72 | KRT72 | GO:0031424//keratinization;GO:0070268//cornification | GO:0005198//structural molecule activity | GO:0070062//extracellular exosome;GO:0005829//cytosol;GO:0045095//keratin filament | Posttranslational modification, protein turnover, chaperones | Chaperone-dependent E3 ubiquitin protein ligase (contains TPR repeats) |
| P62834 | RAP1A_HUMAN | Ras-related protein Rap-1A | RAP1A | GO:0000186//activation of MAPKK activity;GO:1990090//cellular response to nerve growth factor stimulus;GO:1905451//positive regulation of Fc-gamma receptor signaling pathway involved in phagocytosis;GO:0032966//negative regulation of collagen biosynthetic process;GO:0007165//signal transduction;GO:0046326//positive regulation of glucose import;GO:0061028//establishment of endothelial barrier;GO:0043547//positive regulation of GTPase activity;GO:0038180//nerve growth factor signaling pathway;GO:0071333//cellular response to glucose stimulus;GO:0050796//regulation of insulin secretion;GO:0032486//Rap protein signal transduction;GO:0007264//small GTPase mediated signal transduction;GO:0070374//positive regulation of ERK1 and ERK2 cascade;GO:0009743//response to carbohydrate;GO:0071407//cellular response to organic cyclic compound;GO:0071320//cellular response to cAMP;GO:0043312//neutrophil degranulation;GO:0035690//cellular response to drug;GO:0097327//response to antineoplastic agent;GO:2001214//positive regulation of vasculogenesis;GO:0097421//liver regeneration;GO:0015031//protein transport;GO:1901888//regulation of cell junction assembly;GO:0045860//positive regulation of protein kinase activity;GO:2000301//negative regulation of synaptic vesicle exocytosis;GO:0010976//positive regulation of neuron projection development | GO:0032403//protein complex binding;GO:0005525//GTP binding;GO:0008565//protein transporter activity;GO:0017034//Rap guanyl-nucleotide exchange factor activity;GO:0003924//GTPase activity;GO:0017016//Ras GTPase binding | GO:0005770//late endosome;GO:0032045//guanyl-nucleotide exchange factor complex;GO:0035579//specific granule membrane;GO:0030054//cell junction;GO:0005737//cytoplasm;GO:0043209//myelin sheath;GO:0016020//membrane;GO:0043005//neuron projection;GO:0048471//perinuclear region of cytoplasm;GO:0045335//phagocytic vesicle;GO:0005886//plasma membrane;GO:0070062//extracellular exosome;GO:0005829//cytosol;GO:0005769//early endosome | General function prediction only | Ras-related GTPase |
| P49590 | SYHM_HUMAN | Probable histidine--tRNA ligase, mitochondrial | HARS2 | GO:0006427//histidyl-tRNA aminoacylation;GO:0006418//tRNA aminoacylation for protein translation;GO:0006412//translation | GO:0004821//histidine-tRNA ligase activity;GO:0003723//RNA binding;GO:0005524//ATP binding;GO:0042803//protein homodimerization activity | GO:0005739//mitochondrion;GO:0005759//mitochondrial matrix | Translation, ribosomal structure and biogenesis | Histidyl-tRNA synthetase |
| Q96CW1 | AP2M1_HUMAN | AP-2 complex subunit mu | AP2M1 | GO:0032802//low-density lipoprotein particle receptor catabolic process;GO:0072583//clathrin-dependent endocytosis;GO:0061024//membrane organization;GO:0097494//regulation of vesicle size;GO:0016185//synaptic vesicle budding from presynaptic endocytic zone membrane;GO:0006886//intracellular protein transport;GO:0019886//antigen processing and presentation of exogenous peptide antigen via MHC class II;GO:1903077//negative regulation of protein localization to plasma membrane;GO:0050690//regulation of defense response to virus by virus;GO:0060071//Wnt signaling pathway, planar cell polarity pathway;GO:0048013//ephrin receptor signaling pathway;GO:0016192//vesicle-mediated transport;GO:0006897//endocytosis;GO:0034383//low-density lipoprotein particle clearance;GO:0007018//microtubule-based movement;GO:0016050//vesicle organization;GO:0031623//receptor internalization | GO:0097718//disordered domain specific binding;GO:0044325//ion channel binding;GO:0005215//transporter activity;GO:0008289//lipid binding;GO:0005048//signal sequence binding;GO:0050750//low-density lipoprotein particle receptor binding | GO:0005905//clathrin-coated pit;GO:0030131//clathrin adaptor complex;GO:0030133//transport vesicle;GO:0030666//endocytic vesicle membrane;GO:0036020//endolysosome membrane;GO:0030669//clathrin-coated endocytic vesicle membrane;GO:0005739//mitochondrion;GO:0030141//secretory granule;GO:0030125//clathrin vesicle coat;GO:0070062//extracellular exosome;GO:0045334//clathrin-coated endocytic vesicle;GO:0005886//plasma membrane;GO:0030122//AP-2 adaptor complex;GO:0043195//terminal bouton;GO:0005829//cytosol;GO:0005765//lysosomal membrane | Intracellular trafficking, secretion, and vesicular transport | Adaptor complexes medium subunit family |

**Supplementary Table 4 Analysis of KEGG pathway of 21 important proteins**

| **Pathway** | **Total** | **Expected** | **Hits** | **P.Value** | **FDR** |
| --- | --- | --- | --- | --- | --- |
| Complement and coagulation cascades | 79 | 0.868 | 14 | 8.63E-14 | 2.75E-11 |
| Glycolysis / Gluconeogenesis | 68 | 0.747 | 13 | 2.54E-13 | 4.03E-11 |
| Biosynthesis of amino acids | 75 | 0.824 | 12 | 2.08E-11 | 2.20E-09 |
| HIF-1 signaling pathway | 100 | 1.1 | 12 | 6.70E-10 | 5.32E-08 |
| Carbon metabolism | 116 | 1.27 | 12 | 3.81E-09 | 2.40E-07 |
| African trypanosomiasis | 37 | 0.406 | 8 | 4.52E-09 | 2.40E-07 |
| Malaria | 49 | 0.538 | 7 | 8.90E-07 | 4.04E-05 |
| Prostate cancer | 97 | 1.07 | 8 | 9.93E-06 | 0.000379 |
| Endocrine resistance | 98 | 1.08 | 8 | 1.07E-05 | 0.000379 |
| Glioma | 75 | 0.824 | 7 | 1.63E-05 | 0.000519 |
| Fluid shear stress and atherosclerosis | 139 | 1.53 | 9 | 1.95E-05 | 0.000563 |
| Endometrial cancer | 58 | 0.637 | 6 | 3.77E-05 | 0.000981 |
| Colorectal cancer | 86 | 0.945 | 7 | 4.01E-05 | 0.000981 |
| Focal adhesion | 199 | 2.19 | 10 | 5.90E-05 | 0.00126 |
| Platelet activation | 124 | 1.36 | 8 | 5.95E-05 | 0.00126 |
| Central carbon metabolism in cancer | 65 | 0.714 | 6 | 7.24E-05 | 0.00144 |
| Non-small cell lung cancer | 66 | 0.725 | 6 | 7.89E-05 | 0.00148 |
| Choline metabolism in cancer | 99 | 1.09 | 7 | 9.91E-05 | 0.0017 |
| Renal cell carcinoma | 69 | 0.758 | 6 | 0.000101 | 0.0017 |
| Vitamin digestion and absorption | 24 | 0.264 | 4 | 0.000122 | 0.00194 |
| Melanoma | 72 | 0.791 | 6 | 0.000129 | 0.00195 |
| Pancreatic cancer | 75 | 0.824 | 6 | 0.000162 | 0.00234 |
| Breast cancer | 147 | 1.61 | 8 | 0.000196 | 0.00271 |
| EGFR tyrosine kinase inhibitor resistance | 79 | 0.868 | 6 | 0.000216 | 0.00286 |
| Proteoglycans in cancer | 201 | 2.21 | 9 | 0.000336 | 0.00428 |
| Rap1 signaling pathway | 206 | 2.26 | 9 | 0.000403 | 0.00493 |
| Pathways in cancer | 530 | 5.82 | 15 | 0.000576 | 0.00678 |
| Measles | 138 | 1.52 | 7 | 0.000764 | 0.00844 |
| AGE-RAGE signaling pathway in diabetic complications | 100 | 1.1 | 6 | 0.000769 | 0.00844 |
| Prolactin signaling pathway | 70 | 0.769 | 5 | 0.000983 | 0.01 |
| Homologous recombination | 41 | 0.45 | 4 | 0.00101 | 0.01 |
| Fat digestion and absorption | 41 | 0.45 | 4 | 0.00101 | 0.01 |
| Phospholipase D signaling pathway | 148 | 1.63 | 7 | 0.00115 | 0.0111 |
| Platinum drug resistance | 73 | 0.802 | 5 | 0.00119 | 0.0111 |
| PPAR signaling pathway | 74 | 0.813 | 5 | 0.00126 | 0.0115 |
| Chronic myeloid leukemia | 76 | 0.835 | 5 | 0.00142 | 0.0126 |
| Hepatitis C | 155 | 1.7 | 7 | 0.00151 | 0.013 |
| RNA degradation | 79 | 0.868 | 5 | 0.00169 | 0.0142 |
| Neurotrophin signaling pathway | 119 | 1.31 | 6 | 0.0019 | 0.0155 |
| Influenza A | 167 | 1.83 | 7 | 0.00231 | 0.018 |
| Regulation of actin cytoskeleton | 214 | 2.35 | 8 | 0.00232 | 0.018 |
| Legionellosis | 55 | 0.604 | 4 | 0.00302 | 0.0229 |
| FoxO signaling pathway | 132 | 1.45 | 6 | 0.0032 | 0.0237 |
| Tuberculosis | 179 | 1.97 | 7 | 0.00341 | 0.0245 |
| Small cell lung cancer | 93 | 1.02 | 5 | 0.00347 | 0.0245 |
| Apoptosis | 136 | 1.49 | 6 | 0.00371 | 0.0256 |
| Estrogen signaling pathway | 138 | 1.52 | 6 | 0.00398 | 0.027 |
| Pentose phosphate pathway | 30 | 0.33 | 3 | 0.00419 | 0.0274 |
| Kaposi's sarcoma-associated herpesvirus infection | 186 | 2.04 | 7 | 0.00422 | 0.0274 |
| MAPK signaling pathway | 295 | 3.24 | 9 | 0.00488 | 0.0308 |
| T cell receptor signaling pathway | 101 | 1.11 | 5 | 0.00493 | 0.0308 |
| Fructose and mannose metabolism | 33 | 0.363 | 3 | 0.0055 | 0.0337 |
| Non-alcoholic fatty liver disease (NAFLD) | 149 | 1.64 | 6 | 0.00578 | 0.0343 |
| Acute myeloid leukemia | 66 | 0.725 | 4 | 0.00583 | 0.0343 |
| Viral carcinogenesis | 201 | 2.21 | 7 | 0.00641 | 0.0368 |
| Staphylococcus aureus infection | 68 | 0.747 | 4 | 0.00648 | 0.0368 |
| Adipocytokine signaling pathway | 69 | 0.758 | 4 | 0.00682 | 0.0381 |
| TNF signaling pathway | 110 | 1.21 | 5 | 0.00706 | 0.0387 |
| B cell receptor signaling pathway | 71 | 0.78 | 4 | 0.00754 | 0.0403 |
| Leukocyte transendothelial migration | 112 | 1.23 | 5 | 0.00761 | 0.0403 |
| p53 signaling pathway | 72 | 0.791 | 4 | 0.00792 | 0.0406 |
| Adherens junction | 72 | 0.791 | 4 | 0.00792 | 0.0406 |
| Jak-STAT signaling pathway | 162 | 1.78 | 6 | 0.00861 | 0.0433 |
| Thyroid hormone signaling pathway | 116 | 1.27 | 5 | 0.00879 | 0.0433 |
| Hepatitis B | 163 | 1.79 | 6 | 0.00886 | 0.0433 |
| Sphingolipid signaling pathway | 119 | 1.31 | 5 | 0.00976 | 0.047 |
| AMPK signaling pathway | 120 | 1.32 | 5 | 0.0101 | 0.0472 |
| Bladder cancer | 41 | 0.45 | 3 | 0.0101 | 0.0472 |
| Osteoclast differentiation | 128 | 1.41 | 5 | 0.0131 | 0.0604 |
| Ras signaling pathway | 232 | 2.55 | 7 | 0.0135 | 0.0615 |
| ErbB signaling pathway | 85 | 0.934 | 4 | 0.014 | 0.0627 |
| Salmonella infection | 86 | 0.945 | 4 | 0.0146 | 0.0643 |
| Longevity regulating pathway | 89 | 0.978 | 4 | 0.0163 | 0.0712 |
| Fc gamma R-mediated phagocytosis | 91 | 1 | 4 | 0.0176 | 0.0756 |
| GnRH signaling pathway | 93 | 1.02 | 4 | 0.0189 | 0.0802 |
| Epstein-Barr virus infection | 201 | 2.21 | 6 | 0.0228 | 0.0956 |
| Phagosome | 152 | 1.67 | 5 | 0.0256 | 0.106 |
| Glucagon signaling pathway | 103 | 1.13 | 4 | 0.0264 | 0.106 |
| Chagas disease (American trypanosomiasis) | 103 | 1.13 | 4 | 0.0264 | 0.106 |
| VEGF signaling pathway | 59 | 0.648 | 3 | 0.0268 | 0.106 |
| Toll-like receptor signaling pathway | 104 | 1.14 | 4 | 0.0272 | 0.107 |
| HTLV-I infection | 219 | 2.41 | 6 | 0.033 | 0.128 |
| Fc epsilon RI signaling pathway | 68 | 0.747 | 3 | 0.0385 | 0.147 |
| Alzheimer's disease | 171 | 1.88 | 5 | 0.0396 | 0.15 |
| PI3K-Akt signaling pathway | 354 | 3.89 | 8 | 0.04 | 0.15 |
| Thyroid hormone synthesis | 74 | 0.813 | 3 | 0.0475 | 0.174 |
| Leishmaniasis | 74 | 0.813 | 3 | 0.0475 | 0.174 |

**Supplementary Table 5 Network analyst enrichment of Figure 5B**

| **Pathway** | **Total** | **Expected** | **Hits** | **P.Value** | **FDR** |
| --- | --- | --- | --- | --- | --- |
| Complement and coagulation cascades | 79 | 0.123 | 6 | 8.23E-10 | 2.62E-07 |
| African trypanosomiasis | 37 | 0.0574 | 4 | 2.13E-07 | 3.39E-05 |
| Malaria | 49 | 0.076 | 3 | 5.05E-05 | 0.00535 |
| Platelet activation | 124 | 0.192 | 3 | 0.000795 | 0.0632 |
| PPAR signaling pathway | 74 | 0.115 | 2 | 0.0056 | 0.356 |
| Vitamin digestion and absorption | 24 | 0.0372 | 1 | 0.0366 | 1 |
| Fat digestion and absorption | 41 | 0.0636 | 1 | 0.0618 | 1 |
| Glycolysis / Gluconeogenesis | 68 | 0.105 | 1 | 0.101 | 1 |
| Staphylococcus aureus infection | 68 | 0.105 | 1 | 0.101 | 1 |
| Biosynthesis of amino acids | 75 | 0.116 | 1 | 0.11 | 1 |

**Supplementary Table 6 Network analyst enrichment of Figure 5C**

| **Pathway** | **Total** | **Expected** | **Hits** | **P.Value** | **FDR** |
| --- | --- | --- | --- | --- | --- |
| Arrhythmogenic right ventricular cardiomyopathy (ARVC) | 72 | 0.00931 | 1 | 0.00931 | 1 |
| Hypertrophic cardiomyopathy (HCM) | 85 | 0.011 | 1 | 0.011 | 1 |
| Dilated cardiomyopathy | 91 | 0.0118 | 1 | 0.0118 | 1 |

**Supplementary Table 7 Network analyst enrichment of Figure 5D**

| **Pathway** | **Total** | **Expected** | **Hits** | **P.Value** | **FDR** |
| --- | --- | --- | --- | --- | --- |
| Ferroptosis | 40 | 0.0207 | 3 | 5.10E-07 | 0.000162 |
| Mineral absorption | 51 | 0.0264 | 2 | 0.000253 | 0.0403 |
| Porphyrin and chlorophyll metabolism | 42 | 0.0217 | 1 | 0.0215 | 1 |
| Acute myeloid leukemia | 66 | 0.0341 | 1 | 0.0337 | 1 |
| Drug metabolism - other enzymes | 79 | 0.0408 | 1 | 0.0402 | 1 |
| Lysosome | 123 | 0.0636 | 1 | 0.0621 | 1 |
| Phagosome | 152 | 0.0786 | 1 | 0.0763 | 1 |
| Transcriptional misregulation in cancer | 186 | 0.0962 | 1 | 0.0928 | 1 |

**Supplementary Table 8 Network analyst enrichment of Figure 5E**

| **Pathway** | **Total** | **Expected** | **Hits** | **P.Value** | **FDR** |
| --- | --- | --- | --- | --- | --- |
| Antigen processing and presentation | 77 | 0.0299 | 2 | 0.000291 | 0.0927 |
| Lysosome | 123 | 0.0477 | 2 | 0.000744 | 0.0964 |
| Apoptosis | 136 | 0.0527 | 2 | 0.00091 | 0.0964 |
| Renin secretion | 69 | 0.0268 | 1 | 0.0265 | 1 |
| Salivary secretion | 90 | 0.0349 | 1 | 0.0345 | 1 |
| Autophagy - animal | 128 | 0.0496 | 1 | 0.0488 | 1 |
| Phagosome | 152 | 0.0589 | 1 | 0.0578 | 1 |
| NOD-like receptor signaling pathway | 178 | 0.069 | 1 | 0.0675 | 1 |
| Tuberculosis | 179 | 0.0694 | 1 | 0.0678 | 1 |
